# Supplementary material
Source: Frontiers journal article supplement (https://www.frontiersin.org/articles/525893)
Supplement: Table_1.XLSX [file Table_1.XLSX]

## Sheet: Header
The following supplementray material accompanies the article
Regional variation in Kemp’s ridley sea turtle diet composition and its potential relationship with somatic growth
Matthew D. Ramirez1*, Larisa Avens2, Lisa R. Goshe2, Melissa L. Snover3, Melissa Cook4, and Selina S. Heppell1
1Oregon State University, Department of Fisheries and Wildlife, Corvallis, Oregon, 97331, USA
2NOAA National Marine Fisheries Service, Southeast Fisheries Science Center, Beaufort Laboratory, North Carolina, 28516, USA
3Population Ecology Services, Pago Pago, 96799, American Samoa
4NOAA National Marine Fisheries Service, Southeast Fisheries Science Center, Pascagoula, Mississippi, 39567, USA
*Email: mdramirez@uri.edu

## Sheet: Table S1
Phylum	Family/Order	Prey Group	Common Name	Scientific Name	Feeding Mode	N	δ15N (‰)	SD	N	δ13C (‰)	SD	State	Sampling Location	Sampling Year	Habitat	Source
Mollusca	Arcidae	Bivalve	Clam	Arca ponderosa	Suspension Feeder				1	-18.3		NC	Phillips Island, Newport River estuary	1975	estuary	Thayer et al. 1978
Mollusca	Arcidae	Bivalve	Clam	Arca transversa	Suspension Feeder				1	-18.9		NC	Phillips Island, Newport River estuary	1975	estuary	Thayer et al. 1978
Mollusca	Mactridae	Bivalve	Atlantic rangia	Rangia cuneata, Corbicula fluminea	Suspension Feeder	20	6.28169	0.185915	20	-22.6747	0.373494	NC	Lower Alligator River estuary	2002	estuary	Bucci et al. 2007b
Mollusca	Mactridae	Bivalve	Atlantic rangia	Rangia cuneata, Corbicula fluminea	Suspension Feeder	5	9.25634	0.253521	5	-24.1566	0.192771	NC	Lower Neuse River estuary	2002	estuary	Bucci et al. 2007b
Mollusca	Mactridae	Bivalve	Atlantic rangia	Rangia cuneata	Suspension Feeder	15	9.15	0.86				LA	Bay Henry, SE Louisiana	2005	bay	Fry 2008
Mollusca	Mactridae	Bivalve	Atlantic rangia	Rangia cuneata	Suspension Feeder	1	6.8		1	-27.4		MS	Grand Bay National Estuarine Research Reserve	2006	estuary	Rush et al. 2010
Mollusca	Mactridae	Bivalve	Atlantic rangia	Rangia cuneata	Suspension Feeder	14	7.2	0.279	14	-26.3	0.59	MS	Pascagoula Marsh Coastal Preserve	2006	estuary	Rush et al. 2010
Mollusca	Mytilidae	Bivalve	Ribbed mussel	Geukensia demissa	Suspension Feeder	1	7.6		1	-25.3		MS	Bay St. Louis	2008	salt marsh	Baker et al. 2013
Mollusca	Mytilidae	Bivalve	Ribbed mussel	Geukensia demissa	Suspension Feeder	3	6.4	0.519615	3	-18.3	0.34641	NC	Pamilico Sound	2008	salt marsh	Baker et al. 2013
Mollusca	Mytilidae	Bivalve	Ribbed mussel	Geukensia demissa	Suspension Feeder	2	7.9	0.565685	2	-19.1	0.353553	NC	Newport River	2008	salt marsh	Baker et al. 2013
Mollusca	Mytilidae	Bivalve	Ribbed mussel	Geukensia demissa	Suspension Feeder	1	6.6		1	-20.2		TX	Aransas Bay	2008	salt marsh	Baker et al. 2013
Mollusca	Mytilidae	Bivalve	Hooked mussel	Ischadium recurvum	Suspension Feeder	15	6.94	0.232379	15	-24.83	0.580948	LA	Sister (Caillou) Lake	2010	salt marsh	Beck and La Peyre 2015
Mollusca	Mytilidae	Bivalve	Hooked mussel	Ischadium recurvum	Suspension Feeder	15	8.99	0.348569	15	-25.69	0.426028	LA	Sabine Lake	2010	salt marsh	Beck and La Peyre 2015
Mollusca	Mytilidae	Bivalve	Hooked mussel	Ischadium recurvum	Suspension Feeder	15	9.17	0.271109	15	-23.97	0.309839	LA	Northern Calcasieu Lake	2010	salt marsh	Beck and La Peyre 2015
Mollusca	Mytilidae	Bivalve	Mussel	Brachidontes spp	Suspension Feeder				3	-24.1		FL(FG)	Apalachicola Bay, Cat point & Dry bar	1992	bay	Chanton and Lewis 2002
Mollusca	Mytilidae	Bivalve	Hooked mussel	Ischadium recurvum	Suspension Feeder	15	5.85602	0.758533	15	-24.9034	1.04091	MS	Grand Bay National Estuarine Research Reserve	2006	bay	Dillon et al. 2015
Mollusca	Mytilidae	Bivalve	Ribbed mussel	Geukensia demissa	Suspension Feeder				12	-22.9756		LA	Barataria Bay	2010	bay	Fry and Anderson 2014
Mollusca	Mytilidae	Bivalve	Ribbed mussel	Geukensia demissa	Suspension Feeder				12	-22.3659		LA	Terrebonne Bay	2010	bay	Fry and Anderson 2014
Mollusca	Mytilidae	Bivalve	Ribbed mussel	Geukensia demissa	Suspension Feeder	6	8.2	0.734847	6	-17.3	0.244949	VA	Egging Marsh	1997	salt marsh	Knoff et al. 2001
Mollusca	Mytilidae	Bivalve	Mussel	Unidentified	Suspension Feeder	55	7.43455	0.473825	55	-24.0455	0.749902	LA	Barataria Bay	2013	bay	Olin et al. 2017
Mollusca	Mytilidae	Bivalve	Ribbed mussel	Geukensia demissa	Suspension Feeder	2	6.2	0.566	2	-27.2	1.697	MS	Pascagoula Marsh Coastal Preserve	2006	estuary	Rush et al. 2010
Mollusca	Mytilidae	Bivalve	Ribbed mussel	Geukensia demissa	Suspension Feeder	8	6.7	0.54	8	-22.6	0.759	MS	Grand Bay National Estuarine Research Reserve	2006	estuary	Rush et al. 2010
Mollusca	Mytilidae	Bivalve	Carolina marsh clam	Polymesoda caroliniana	Suspension Feeder	1	8.5		1	-22		MS	Graveline Bay Marsh	1988	salt marsh	Sullivan and Moncreiff 1990
Mollusca	Mytilidae	Bivalve	Hooked mussel	Ischadium recurvum	Suspension Feeder	4	6.6		6	-21.9		MS	Graveline Bay Marsh	1988	salt marsh	Sullivan and Moncreiff 1990
Mollusca	Mytilidae	Bivalve	Ribbed mussel	Geukensia demissa	Suspension Feeder	2	7.3		2	-21.8		MS	Graveline Bay Marsh	1988	salt marsh	Sullivan and Moncreiff 1990
Mollusca	Mytilidae	Bivalve	Mussel	Unidentified	Suspension Feeder				1	-21.1		AL	Mobile Bay	2010	shelf	Wilson et al. 2015
Mollusca	Mytilidae	Bivalve	Mussel	Unidentified	Suspension Feeder				1	-22.1		FL(FG)	Apalachicola Bay	2010	bay	Wilson et al. 2015
Mollusca	Mytilidae	Bivalve	Mussel	Unidentified	Suspension Feeder				3	-24.2	0.6	LA	Barataria Bay	2010	bay	Wilson et al. 2015
Mollusca	Mytilidae	Bivalve	Mussel	Unidentified	Suspension Feeder				1	-27.1		MS	Gulfport	2010	bay	Wilson et al. 2015
Mollusca	Mytilidae	Bivalve	Mussel	Unidentified	Suspension Feeder	1	8		1	-22.2		TX	Mad Island Marsh Preserve	1999	salt marsh	Winemiller et al. 2007
Mollusca	Ostreidae	Bivalve	Eastern oyster	Crassostrea virginica	Suspension Feeder	40	4.99	0.496739	40	-22.5625	0.932604	FL(FG)	Estero Bay, Estero River mouth	2008	bay	Abeels et al. 2012
Mollusca	Ostreidae	Bivalve	Eastern oyster	Crassostrea virginica	Suspension Feeder	2	7.8		2	-20.7		FL(FG)	Cedar Key	2008	salt marsh	Baker et al. 2013
Mollusca	Ostreidae	Bivalve	Eastern oyster	Crassostrea virginica	Suspension Feeder	5	9.3	0.223607	5	-18	0.173205	LA	Timbalier Bay	2008	salt marsh	Baker et al. 2013
Mollusca	Ostreidae	Bivalve	Eastern oyster	Crassostrea virginica	Suspension Feeder	1	6.8		1	-19.2		NC	Pamilico Sound	2008	salt marsh	Baker et al. 2013
Mollusca	Ostreidae	Bivalve	Eastern oyster	Crassostrea virginica	Suspension Feeder	3	8.9	0.34641	3	-21.1	0.173205	TX	Aransas Bay	2008	salt marsh	Baker et al. 2013
Mollusca	Ostreidae	Bivalve	Eastern oyster	Crassostrea virginica	Suspension Feeder	1	8.9		1	-20.9		TX	Sabine Lake	2008	salt marsh	Baker et al. 2013
Mollusca	Ostreidae	Bivalve	Eastern oyster	Crassostrea virginica	Suspension Feeder	15	9.36	0.232379	15	-23.2	0.503488	LA	Sister (Caillou) Lake	2010	salt marsh	Beck and La Peyre 2015
Mollusca	Ostreidae	Bivalve	Eastern oyster	Crassostrea virginica	Suspension Feeder	15	11.54	0.271109	15	-23.7	0.464758	LA	Sabine Lake	2010	salt marsh	Beck and La Peyre 2015
Mollusca	Ostreidae	Bivalve	Eastern oyster	Crassostrea virginica	Suspension Feeder	15	11.64	0.774597	15	-22.54	0.309839	LA	Northern Calcasieu Lake	2010	salt marsh	Beck and La Peyre 2015
Mollusca	Ostreidae	Bivalve	Eastern oyster	Crassostrea virginica	Suspension Feeder	15	12.01	0.309839	15	-20.49	0.309839	LA	Southern Calcasieu Lake	2010	salt marsh	Beck and La Peyre 2015
Mollusca	Ostreidae	Bivalve	Eastern oyster	Crassostrea virginica	Suspension Feeder	27	8.47908	1.15937				AL	Mobile Bay, Site 3 (summer) and site 4 (summer and fall)	2007	bay	Biancani et al. 2012
Mollusca	Ostreidae	Bivalve	Eastern oyster	Crassostrea virginica	Suspension Feeder	41	13.3415	2.21705	40	-21.05	2.43659	TX	Aransas and San Antonio Bay	2009	bay	Bishop et al. 2017
Mollusca	Ostreidae	Bivalve	Eastern oyster	Crassostrea virginica	Suspension Feeder	96	9.82083	1				TX	Copano Bay, Mission-Aransas Estuary	2012	bay	Blomberg et al. 2017
Mollusca	Ostreidae	Bivalve	Eastern oyster	Crassostrea virginica	Suspension Feeder				28	-23.3464		FL(FG)	Apalachicola Bay, Cat point & Dry bar	1992	bay	Chanton and Lewis 2002
Mollusca	Ostreidae	Bivalve	Eastern oyster	Crassostrea virginica	Suspension Feeder	70	7.11452	0.603732	70	-24.0074	1.31385	MS	Grand Bay National Estuarine Research Reserve	2006	bay	Dillon et al. 2015
Mollusca	Ostreidae	Bivalve	Eastern oyster	Crassostrea virginica	Suspension Feeder	33	9.5	0.574456	33	-22.4	1.14891	VA	Lynnhave River, lower Chesapeake Bay	2005	bay	Fertig et al. 2014
Mollusca	Ostreidae	Bivalve	Eastern oyster	Crassostrea virginica	Suspension Feeder	19	11	0.87178	19	-20.5	0.87178	VA	Elizabeth River, lower Chesapeake Bay	2005	bay	Fertig et al. 2014
Mollusca	Ostreidae	Bivalve	Eastern oyster	Crassostrea virginica	Suspension Feeder	36	5.57389	0.379899	36	-26.4774	1.56638	FL(FG)	Ten Thousand Islands, wet and dry season	2012	bay	Loh et al. 2017
Mollusca	Ostreidae	Bivalve	Eastern oyster	Crassostrea virginica	Suspension Feeder	10	9.29	0.758947	10	-22.79	1.20167	TX	Lavaca Bay	2006	bay	Oakley et al. 2014
Mollusca	Ostreidae	Bivalve	Eastern oyster	Crassostrea virginica	Suspension Feeder	150	8.24776	0.306742	150	-21.6793	0.397513	FL(FG)	Apalachicola Bay	2006	bay	Oczkowski et al. 2011
Mollusca	Ostreidae	Bivalve	Eastern oyster	Crassostrea virginica	Suspension Feeder	6	5.75	0.547723	6	-23.25	0.821584	FL(FG)	South-central Coast, Caloosahatchee estuary, Dry and wet season	2008	estuary	Olin et al. 2013
Mollusca	Ostreidae	Bivalve	Eastern oyster	Crassostrea virginica	Suspension Feeder	16	8.8	0.4	16	-25.6	0.5	MS	Mississippi Sound	2010	shelf	Olsen et al. 2014
Mollusca	Ostreidae	Bivalve	Eastern oyster	Crassostrea virginica	Suspension Feeder	3	8.1		6	-21.4		MS	Graveline Bay Marsh	1988	salt marsh	Sullivan and Moncreiff 1990
Mollusca	Ostreidae	Bivalve	Oyster	Unidentified	Suspension Feeder				2	-21.4	0.2	AL	Mobile Bay	2010	bay	Wilson et al. 2015
Mollusca	Ostreidae	Bivalve	Oyster	Unidentified	Suspension Feeder				10	-22	1	FL(FG)	Apalachicola Bay	2010	bay	Wilson et al. 2015
Mollusca	Ostreidae	Bivalve	Oyster	Unidentified	Suspension Feeder				2	-23.8	0.2	LA	Barataria Bay	2010	bay	Wilson et al. 2015
Mollusca	Ostreidae	Bivalve	Oyster	Unidentified	Suspension Feeder				7	-23.8	0.7	LA	Terrebonne Bay	2010	bay	Wilson et al. 2015
Mollusca	Ostreidae	Bivalve	Oyster	Unidentified	Suspension Feeder				2	-26.4	2.5	MS	Gulfport	2010	bay	Wilson et al. 2015
Mollusca	Ostreidae	Bivalve	Oyster	Unidentified	Suspension Feeder	4	10.2	1.3	4	-22.76	0.3	TX	Mad Island Marsh Preserve	1999	salt marsh	Winemiller et al. 2007
Mollusca	Pectinidae	Bivalve	Calico scallop	Argopecten gibbus	Suspension Feeder	23	7.2	0.3	23	-17.6	0.5	FL(FG)	outer shelf	1998	shelf	Sulak et al. 2012
Mollusca	Pectinidae	Bivalve	Bay scallop	Argopecten irradians	Suspension Feeder				4	-18.7	0.52	NC	Phillips Island, Newport River estuary	1975	estuary	Thayer et al. 1978
Mollusca	Tellinidae	Bivalve	Tellin spp	Tellina alternata	Suspension Feeder	1	7.5		1	-19.2		MS	Mississippi Sound, Horn Island seagrass beds	1991	shelf	Moncreiff and Sullivan 2001
Mollusca	Tellinidae	Bivalve	Baltic macoma clam	Macoma balthica	Suspension Feeder				1	-18.6		NC	Phillips Island, Newport River estuary	1975	estuary	Thayer et al. 1978
Mollusca	Tellinidae	Bivalve	Narrowed macoma clam	Macoma tenta	Suspension Feeder				1	-17.8		NC	Phillips Island, Newport River estuary	1975	estuary	Thayer et al. 1978
Mollusca	Tellinidae	Bivalve	Tellin spp	Tellina versicolor	Suspension Feeder				1	-17.3		NC	Phillips Island, Newport River estuary	1975	estuary	Thayer et al. 1978
Mollusca	Veneridae	Bivalve	Northern quahog	Mercenaria mercenaria	Suspension Feeder				1	-21.5		FL(FG)	Apalachicola Bay, Cat point	1992	bay	Chanton and Lewis 2002
Mollusca	Veneridae	Bivalve	Northern quahog	Mercenaria mercenaria	Suspension Feeder	4	9.1	0.141421	4	-19.47	0	NC	Core sound	2007	shelf	Deehr et al. 2014
Mollusca	Veneridae	Bivalve	Marsh clam	Unidentified	Suspension Feeder	1	6		1	-20		FL(FG)	Florida Bay	2012	bay	Denton et al. 2019
Mollusca	Veneridae	Bivalve	Northern quahog	Mercenaria mercenaria	Suspension Feeder	35	11.72	0.809982	35	-18.8143	0.889641	VA	Virginia Coast Reserve LTER site	2010	bay	Hondula and Price 2014
Mollusca	Veneridae	Bivalve	Northern quahog	Mercenaria mercenaria	Suspension Feeder	4	8.8	1.6	4	-17.4	1.4	VA	Egging Marsh	1997	lagoon	Knoff et al. 2001
Mollusca	Veneridae	Bivalve	Southern quahog	Mercenaria campechiensis	Suspension Feeder	2	10.8		2	-18.5		MS	Mississippi Sound, Horn Island seagrass beds	1991	shelf	Moncreiff and Sullivan 2001
Mollusca	Veneridae	Bivalve	Clam	Chione cancellata	Suspension Feeder				1	-18.7		NC	Phillips Island, Newport River estuary	1975	estuary	Thayer et al. 1978
Arthropoda	Aethridae	Crab	Calico box crab	Hepatus epheliticus	Omnivore	2	14.1		2	-16.2		MS	Mississippi Sound, Horn Island seagrass beds	1991	shelf	Moncreiff and Sullivan 2001
Arthropoda	Diogenidae	Crab	Striped hermit crab	Clibanarius vittatus	Omnivore	72	9.6		72	-15.1		MS	Mississippi Sound, Horn Island seagrass beds	1991	shelf	Moncreiff and Sullivan 2001
Arthropoda	Diogenidae	Crab	Striped hermit crab	Clibanarius vittatus	Omnivore	8	11.6525	0.372531	8	-19.3513	0.411482	LA	Barataria Bay, artificial reef and mud bottom	2007	bay	Simonsen 2008
Arthropoda	Diogenidae	Crab	Striped hermit crab	Clibanarius vittatus	Omnivore	1	9.4		2	-19.6		MS	Graveline Bay Marsh	1988	salt marsh	Sullivan and Moncreiff 1990
Arthropoda	Epialtidae	Crab	Spider crab	Libinia spp	Omnivore	3	3.27	0.866025	3	-21.85	2.21703	FL(FG)	Estero Bay, Estero River mouth	2008	bay	Abeels et al. 2012
Arthropoda	Epialtidae	Crab	Longnose spider crab	Libinia dubia	Omnivore	2	13.9		2	-17.2		MS	Mississippi Sound, Horn Island seagrass beds	1991	shelf	Moncreiff and Sullivan 2001
Arthropoda	Epialtidae	Crab	Portly spider crab	Libinia emarginata	Omnivore	2	13.7		2	-17.3		MS	Mississippi Sound, Horn Island seagrass beds	1991	shelf	Moncreiff and Sullivan 2001
Arthropoda	Epialtidae	Crab	Longnose spider crab	Libinia dubia	Omnivore	5	12.6	1.1	5	-17	1.6	NC		1997	shelf	Snover et al. 2010
Arthropoda	Epialtidae	Crab	Portly spider crab	Libinia emarginata	Omnivore	11	10.65	0.48	11	-17.92	1.33	NC	Core sound	2007	shelf	Wallace et al. 2009
Arthropoda	Limulidae	Crab	Horseshoe crab	Limulus polyphemus	Omnivore	1	10.3		1	-13.2		VA	Egging Marsh	1997	lagoon	Knoff et al. 2001
Arthropoda	Limulidae	Crab	Horseshoe crab	Limulus polyphemus	Omnivore	5	12.1		5	-15.7		MS	Mississippi Sound, Horn Island seagrass beds	1991	shelf	Moncreiff and Sullivan 2001
Arthropoda	Limulidae	Crab	Horseshoe crab	Limulus polyphemus	Omnivore	9	13.3	0.9	9	-17	0.6	NC		1997	shelf	Snover et al. 2010
Arthropoda	Limulidae	Crab	Horseshoe crab	Limulus polyphemus	Omnivore	10	11.62	0.46	10	-16.97	1.31	NC	Core sound	2007	shelf	Wallace et al. 2009
Arthropoda	Menippidae	Crab	Stone crab	Menippe mercenaria	Omnivore	11	5.01636	0.087892	11	-19.6491	1.90132	FL(FG)	Estero Bay, Estero River mouth	2008	bay	Abeels et al. 2012
Arthropoda	Menippidae	Crab	Stone crab	Menippe mercenaria	Omnivore	1	14.1		1	-16.5		MS	Mississippi Sound, Horn Island seagrass beds	1991	shelf	Moncreiff and Sullivan 2001
Arthropoda	Menippidae	Crab	Gulf stone crab	Menippe adina	Omnivore	9	9.18	3.39	9	-17.55	2.43	TX	Lavaca Bay	2006	bay	Oakley et al. 2014
Arthropoda	Menippidae	Crab	Gulf stone crab	Menippe adina	Omnivore	36	13.63	0.644553	36	-16.5071	0.380777	LA	Seaward platform	2016	shelf	Reeves et al. 2019
Arthropoda	Multiple	Crab	Crab	Unidentified	Omnivore	5	11.1687	1.36952	5	-22.3608	1.01031	AL	AL coast	2011	shelf	Kroetz et al. 2017
Arthropoda	Paguridae	Crab	Gray hermit crab	Pagurus pollicaris	Omnivore	25	11.6		25	-15.6		MS	Mississippi Sound, Horn Island seagrass beds	1991	shelf	Moncreiff and Sullivan 2001
Arthropoda	Panopeidae	Crab	Flatback mud crab	Eurypanopeus depressus	Omnivore	40	4.0525	0.667645	40	-17.89	1.58256	FL(FG)	Estero Bay, Estero River mouth	2008	bay	Abeels et al. 2012
Arthropoda	Panopeidae	Crab	Knot-fingered mud crab	Panopeus lacustris	Omnivore	1	5.88		1	-17.62		FL(FG)	Estero Bay, Estero River mouth	2008	bay	Abeels et al. 2012
Arthropoda	Panopeidae	Crab	Mud crab	Panopeus spp	Omnivore	4	4.4125	1.00459	4	-20.9625	1.83597	FL(FG)	Estero Bay, Estero River mouth	2008	bay	Abeels et al. 2012
Arthropoda	Panopeidae	Crab	Oystershell mud crab	Panopeus simpsoni	Omnivore	7	4.96714	0.88	7	-19.4557	1.08	FL(FG)	Estero Bay, Estero River mouth	2008	bay	Abeels et al. 2012
Arthropoda	Panopeidae	Crab	Flatback mud crab	Eurypanopeus depressus	Omnivore	15	8.92	0.619677	15	-22.86	1.66538	LA	Sister (Caillou) Lake	2010	salt marsh	Beck and La Peyre 2015
Arthropoda	Panopeidae	Crab	Flatback mud crab	Eurypanopeus depressus	Omnivore	15	11.42	0.503488	15	-21.61	1.93649	LA	Northern Calcasieu Lake	2010	salt marsh	Beck and La Peyre 2015
Arthropoda	Panopeidae	Crab	Flatback mud crab	Eurypanopeus depressus	Omnivore	15	11.6	1.1619	15	-21.03	2.28506	LA	Sabine Lake	2010	salt marsh	Beck and La Peyre 2015
Arthropoda	Panopeidae	Crab	Flatback mud crab	Eurypanopeus depressus	Omnivore	15	12.5	0.464758	15	-20.66	1.1619	LA	Southern Calcasieu Lake	2010	salt marsh	Beck and La Peyre 2015
Arthropoda	Panopeidae	Crab	Black-fingered mud crab	Panopeus herbstii	Omnivore	15	6.2	1.2	15	-23.7	0.7	FL(FG)	Big Sable Creek	2012	bay	Denton et al. 2019
Arthropoda	Panopeidae	Crab	Oystershell mud crab	Panopeus simpsoni	Omnivore	28	6.66901	1.04255	28	-20.0144	1.16608	MS	Grand Bay National Estuarine Research Reserve	2006	bay	Dillon et al. 2015
Arthropoda	Panopeidae	Crab	Estuarine mud crab	Rhithropanopeus harrisii	Omnivore	1	7.6		1	-22.6		FL(FG)	Whitewater Bay, South Florida	1983	bay	Harrigan et al. 1989
Arthropoda	Panopeidae	Crab	Black-fingered mud crab	Panopeus herbstii	Omnivore	3	11.4	0.34641	3	-14.2	0.34641	VA	Egging Marsh	1997	salt marsh	Knoff et al. 2001
Arthropoda	Panopeidae	Crab	Mud crab	Panopeidae spp	Omnivore				3	-14.6829	0.464697	VA	Chesapeake Bay	1999	bay	Pruell et al. 2003
Arthropoda	Panopeidae	Crab	Mud crab	Panopeidae spp	Omnivore				1	-15.6		FL(FG)	Apalachicola Bay	2010	bay	Wilson et al. 2015
Arthropoda	Portunidae	Crab	Blue crab	Callinectes sapidus	Omnivore	1	9.5		1	-17.5		FL(FG)	Cedar Key	2008	salt marsh	Baker et al. 2013
Arthropoda	Portunidae	Crab	Blue crab	Callinectes sapidus	Omnivore	2	10.3	0.282843	2	-17.2	2.68701	LA	Timbalier Bay	2008	salt marsh	Baker et al. 2013
Arthropoda	Portunidae	Crab	Blue crab	Callinectes sapidus	Omnivore	2	11	0.0707107	2	-16.6	0.141421	LA	Barataria Bay	2008	salt marsh	Baker et al. 2013
Arthropoda	Portunidae	Crab	Blue crab	Callinectes sapidus	Omnivore	5	8.9	1.34164	5	-15.2	1.11803	NC	Wrightsville Beach	2008	salt marsh	Baker et al. 2013
Arthropoda	Portunidae	Crab	Blue crab	Callinectes sapidus	Omnivore	4	9.4	3.8	4	-17.1	0.6	NC	Pamilico Sound	2008	salt marsh	Baker et al. 2013
Arthropoda	Portunidae	Crab	Blue crab	Callinectes sapidus	Omnivore	3	7.4	0.173205	3	-15.3	0.69282	TX	Aransas Bay	2008	salt marsh	Baker et al. 2013
Arthropoda	Portunidae	Crab	Blue crab	Callinectes sapidus	Omnivore	2	8.5	2.47487	2	-19.2	1.41421	TX	Sabine Lake	2008	salt marsh	Baker et al. 2013
Arthropoda	Portunidae	Crab	Blue crab	Callinectes sapidus	Omnivore	4	9.2	0.6	4	-16.5	2.66	TX	Galveston Bay	2008	salt marsh	Baker et al. 2013
Arthropoda	Portunidae	Crab	Blue crab	Callinectes sapidus	Omnivore	35	9.6	0.4	35	-23.4	0.8	NC	Lower Alligator River estuary	2002	estuary	Bucci et al. 2007b
Arthropoda	Portunidae	Crab	Blue crab	Callinectes sapidus	Omnivore	15	12	0.7	15	-21.5	1.1	NC	Lower Neuse River estuary	2002	estuary	Bucci et al. 2007b
Arthropoda	Portunidae	Crab	Blue crab	Callinectes sapidus	Omnivore				8	-21.9		FL(FG)	Apalachicola Bay, Cat point & Dry bar	1992	bay	Chanton and Lewis 2002
Arthropoda	Portunidae	Crab	Blue crab	Callinectes sapidus	Omnivore	16	9.5425	0.414039	16	-17.98	0.319408	NC	Core sound	2007	shelf	Deehr et al. 2014
Arthropoda	Portunidae	Crab	Blue crab	Callinectes sapidus	Omnivore	1	6.8		1	-21.9		FL(FG)	Big Sable Creek	2012	bay	Denton et al. 2019
Arthropoda	Portunidae	Crab	Blue crab	Callinectes sapidus	Omnivore	4	7.7	1.1	4	-17.7	1.2	FL(FG)	Florida Bay	2012	bay	Denton et al. 2019
Arthropoda	Portunidae	Crab	Blue crab	Callinectes sapidus	Omnivore	8	5.93745	1.96121	8	-19.1282	1.09892	MS	Grand Bay National Estuarine Research Reserve	2006	bay	Dillon et al. 2015
Arthropoda	Portunidae	Crab	Blue crab	Callinectes sapidus	Omnivore	11	11.4101	0.3381	11	-17.9058	0.15	VA	Goodwin Island	2005	bay	Douglass et al. 2011
Arthropoda	Portunidae	Crab	Swimming crab	Callinectes spp	Omnivore	3	12.3	0.77	3	-17.56	0.4	AL	shelf	2008	shelf	Drymon et al. 2012
Arthropoda	Portunidae	Crab	Blue crab	Callinectes sapidus	Omnivore	14	8.6	0.486415	14	-19.6	0.561249	LA	Terrebonne Bay	2000	bay	Duque 2004
Arthropoda	Portunidae	Crab	Blue crab	Callinectes sapidus	Omnivore	137	10.6022	1.53156	137	-19.5387	2.35416	LA	Ship Shoal	2007	shelf	Gelpi et al. 2013
Arthropoda	Portunidae	Crab	Blue crab	Callinectes sapidus	Omnivore	92	12.7522	1.59063	92	-20.1272	2.3812	LA	Trinity/Tiger Shoal	2007	shelf	Gelpi et al. 2013
Arthropoda	Portunidae	Crab	Blue crab	Callinectes sapidus	Omnivore	1	8.7		1	-23.2		FL(FG)	Whitewater Bay, South Florida	1983	bay	Harrigan et al. 1989
Arthropoda	Portunidae	Crab	Blue crab	Callinectes sapidus	Omnivore	22	9.4076	0.942001	22	-19.1467	1.44211	TX	Aransas National Wildlife Refuge	2004	salt marsh	Hoeinghau and Davis 2007
Arthropoda	Portunidae	Crab	Blue crab	Callinectes sapidus	Omnivore	6	11.5	2.44949	6	-14.6	0.489898	VA	Egging Marsh	1997	salt marsh	Knoff et al. 2001
Arthropoda	Portunidae	Crab	Ocellate lady crab	Ovalipes ocellatus	Omnivore	1	11		1	-17.7		VA	Egging Marsh	1997	ocean	Knoff et al. 2001
Arthropoda	Portunidae	Crab	Speckled swimming crab	Arenaeus cribrarius	Omnivore	3	11.3	0.519615	3	-17.3	0.173205	VA	Egging Marsh	1997	ocean	Knoff et al. 2001
Arthropoda	Portunidae	Crab	Blue crab	Callinectes sapidus	Omnivore	11	13.1		11	-18		MS	Mississippi Sound, Horn Island seagrass beds	1991	shelf	Moncreiff and Sullivan 2001
Arthropoda	Portunidae	Crab	Iridescent swimming crab	Portunus gibbesii	Omnivore	18	13.2		18	-17.3		MS	Mississippi Sound, Horn Island seagrass beds	1991	shelf	Moncreiff and Sullivan 2001
Arthropoda	Portunidae	Crab	Blue crab	Callinectes sapidus	Omnivore	15	9.58	2.01395	15	-17.32	2.51744	TX	Lavaca Bay	2006	bay	Oakley et al. 2014
Arthropoda	Portunidae	Crab	Blue crab	Callinectes sapidus	Omnivore	9	10.2333	1.47551	9	-22.7333	1.47551	FL(FG)	South-central Coast, Caloosahatchee estuary, Dry and wet season	2008	estuary	Olin et al. 2013
Arthropoda	Portunidae	Crab	Blue crab	Callinectes sapidus	Omnivore	15	9.26	2.18773	15	-21.06	1.03701	FL(FG)	South-central Coast, Myakka estuary, Dry and wet season	2008	estuary	Olin et al. 2013
Arthropoda	Portunidae	Crab	Blue crab	Callinectes sapidus	Omnivore				9	-15.9512	1.02439	VA	Chesapeake Bay	1999	bay	Pruell et al. 2003
Arthropoda	Portunidae	Crab	Blue crab	Callinectes sapidus	Omnivore	22	11.4273	1.59463	22	-17.2	1.31149	TX	Nueces Bay	2014	salt marsh	Rezek et al. 2017
Arthropoda	Portunidae	Crab	Blue crab	Callinectes sapidus	Omnivore	3	5.6	0.07	3	-15.3	0.964	MS	Grand Bay National Estuarine Research Reserve	2006	estuary	Rush et al. 2010
Arthropoda	Portunidae	Crab	Blue crab	Callinectes sapidus	Omnivore	3	6.3	0.76	3	-22.7	2.419	MS	Pascagoula Marsh Coastal Preserve	2006	estuary	Rush et al. 2010
Arthropoda	Portunidae	Crab	Blue crab	Callinectes sapidus	Omnivore	7	11.2	0.9	7	-16.6	1.5	NC		1997	shelf	Snover et al. 2010
Arthropoda	Portunidae	Crab	Blue crab	Callinectes sapidus	Omnivore				1	-19.7		TX	Alazan Bay	1991	bay	Street et al. 1997
Arthropoda	Portunidae	Crab	Blue crab	Callinectes sapidus	Omnivore	5	8.6		10	-19.6		MS	Graveline Bay Marsh	1988	salt marsh	Sullivan and Moncreiff 1990
Arthropoda	Portunidae	Crab	Blue crab	Callinectes sapidus	Omnivore	42	11.2205	1.16661	42	-20.5698	2.22462	AL	Mobile Bay	2010	bay	Vedral 2012
Arthropoda	Portunidae	Crab	Blue crab	Callinectes sapidus	Omnivore	4	9.28	0.38	4	-16.26	1.65	NC	Core sound	2007	shelf	Wallace et al. 2009
Arthropoda	Portunidae	Crab	Blue crab	Callinectes sapidus	Omnivore	13	12	0.7	6	-20.3	4.8	FL(FG)	Apalachicola Bay	1992	bay	Wilson et al. 2009
Arthropoda	Portunidae	Crab	Blue crab	Callinectes sapidus	Omnivore				1	-16.4		AL	Mobile Bay	2010	bay	Wilson et al. 2015
Arthropoda	Portunidae	Crab	Blue crab	Callinectes sapidus	Omnivore				1	-18.6		LA	Barataria Bay	2010	bay	Wilson et al. 2015
Arthropoda	Portunidae	Crab	Blue crab	Callinectes sapidus	Omnivore	7	11.1	2.3	7	-19.3	2.3	TX	Mad Island Marsh Preserve	1999	salt marsh	Winemiller et al. 2007
Chordata	Achiridae	Fish	Lined sole	Achirus lineatus	Benthophagous	1	8.02		1	-22.78		FL(FG)	Estero Bay, Estero River mouth	2009	bay	Abeels et al. 2012
Chordata	Achiridae	Fish	Hogchoker	Trinectes maculatus	Benthophagous	6	10.3	0.714143	6	-21.7	2.35584	FL(FG)	South-central Coast, Myakka estuary, Dry and wet season	2008	estuary	Olin et al. 2013
Chordata	Ariidae	Fish	Hardhead sea catfish	Ariopsis felis	Benthophagous				10	-19.36		FL(FG)	Apalachicola Bay, Cat point & Dry bar	1992	bay	Chanton and Lewis 2002
Chordata	Ariidae	Fish	Hardhead sea catfish	Ariopsis felis	Benthophagous	8	13.26	0.4	8	-18.96	1.05	AL	shelf	2008	shelf	Drymon et al. 2012
Chordata	Ariidae	Fish	Hardhead sea catfish	Ariopsis felis	Benthophagous	16	13.4	1.2	16	-19.7	2	LA	Lower Barataria Bay	2003	bay	Fry and Chuchal 2012
Chordata	Ariidae	Fish	Hardhead sea catfish	Ariopsis felis	Benthophagous	25	13.6		25	-17		MS	Mississippi Sound, Horn Island seagrass beds	1991	shelf	Moncreiff and Sullivan 2001
Chordata	Ariidae	Fish	Gafftopsail sea catfish	Bagre marinus	Benthophagous	21	15.53	1.05399	21	-18.62	0.916515	TX	Lavaca Bay	2006	bay	Oakley et al. 2014
Chordata	Ariidae	Fish	Hardhead sea catfish	Ariopsis felis	Benthophagous	24	14.05	1.07778	24	-19.23	1.81262	TX	Lavaca Bay	2006	bay	Oakley et al. 2014
Chordata	Ariidae	Fish	Gafftopsail sea catfish	Bagre marinus	Benthophagous	23	11.8348	2.81526	23	-19.8913	2.81526	FL(FG)	South-central Coast, Caloosahatchee estuary, Dry and wet season	2006	estuary	Olin et al. 2012
Chordata	Ariidae	Fish	Gafftopsail sea catfish	Bagre marinus	Benthophagous	16	11.1	1.2	16	-18.9	2.4	FL(FG)	South-central Coast, Myakka estuary	2006	estuary	Olin et al. 2012
Chordata	Ariidae	Fish	Hardhead sea catfish	Ariopsis felis	Benthophagous	40	12.01	1.45023	40	-21.03	1.93364	FL(FG)	South-central Coast, Caloosahatchee estuary, Dry and wet season	2006	estuary	Olin et al. 2012
Chordata	Ariidae	Fish	Hardhead sea catfish	Ariopsis felis	Benthophagous	23	10.7174	1.74929	23	-21.1174	2.41365	FL(FG)	South-central Coast, Myakka estuary, Dry and wet season	2006	estuary	Olin et al. 2012
Chordata	Ariidae	Fish	Hardhead sea catfish	Ariopsis felis	Benthophagous				7	-12.6		TX	Laguna Madre	1991	bay	Street et al. 1997
Chordata	Ariidae	Fish	Gafftopsail sea catfish	Bagre marinus	Benthophagous	16	12.1	1.1	16	-17.2	1.7	FL(FG)	Suwannee Sound and Cedar Key Estuary	1998	estuary	Sulak et al. 2012
Chordata	Ariidae	Fish	Hardhead sea catfish	Ariopsis felis	Benthophagous	21	10.1	1	21	-19.7	1.6	FL(FG)	Suwannee Sound and Cedar Key Estuary	1998	estuary	Sulak et al. 2012
Chordata	Ariidae	Fish	Hardhead sea catfish	Ariopsis felis	Benthophagous	7	11.5		11	-20.3		MS	Graveline Bay Marsh	1988	salt marsh	Sullivan and Moncreiff 1990
Chordata	Ariidae	Fish	Hardhead sea catfish	Ariopsis felis	Benthophagous	12	14.5	0.7	8	-19.3	0.9	FL(FG)	Apalachicola Bay	1992	bay	Wilson et al. 2009
Chordata	Ariidae	Fish	Hardhead sea catfish	Ariopsis felis	Benthophagous				4	-17.1	0.5	FL(FG)	Apalachicola Bay	2010	bay	Wilson et al. 2015
Chordata	Ariidae	Fish	Hardhead sea catfish	Ariopsis felis	Benthophagous	6	13.7	1	6	-19	1.3	TX	Mad Island Marsh Preserve	1999	salt marsh	Winemiller et al. 2007
Chordata	Carangidae	Fish	Round scad	Decapterus punctatus	Planktivore	29	10.5	0.64622	29	-17.3	0.538516	NC	Onslow and Long Bay	1990	bay	Thomas and Cahoon 1993
Chordata	Clupeidae	Fish	Gulf menhaden	Brevoortia patronus	Planktivore				1	-20.7		FL(FG)	Apalachicola Bay, Dry bar	1992	bay	Chanton and Lewis 2002
Chordata	Clupeidae	Fish	Atlantic menhaden	Brevoortia tyrannus	Planktivore	19	11.7053	0.840168	19	-18.9853	0.246951	NC	Core sound	2007	shelf	Deehr et al. 2014
Chordata	Clupeidae	Fish	Gulf menhaden	Brevoortia patronus	Planktivore	24	12.2	1.46969	24	-21.3	1.46969	LA	Lower Barataria Bay	2003	bay	Fry and Chuchal 2012
Chordata	Clupeidae	Fish	Gulf menhaden	Brevoortia patronus	Planktivore	2	11.9		2	-19.6		MS	Mississippi Sound, Horn Island seagrass beds	1991	shelf	Moncreiff and Sullivan 2001
Chordata	Clupeidae	Fish	Scaled herring	Harengula jaguana	Planktivore	220	13.1		220	-18.2		MS	Mississippi Sound, Horn Island seagrass beds	1991	shelf	Moncreiff and Sullivan 2001
Chordata	Clupeidae	Fish	Gulf menhaden	Brevoortia patronus	Planktivore	36	13.47	1.26	36	-19.96	1.2	TX	Lavaca Bay	2006	bay	Oakley et al. 2014
Chordata	Clupeidae	Fish	Gulf menhaden	Brevoortia patronus	Planktivore	161	12.0811	0.487412	161	-20.8147	1.38277	MS	Mississippi Sound	2010	shelf	Olsen et al. 2014
Chordata	Clupeidae	Fish	Atlantic menhaden	Brevoortia tyrannus	Planktivore				3	-19.4146	0.633677	VA	Chesapeake Bay	1999	bay	Pruell et al. 2003
Chordata	Clupeidae	Fish	Scaled herring	Harengula jaguana	Planktivore	7	9.4	1.4	7	-16.2	2.2	FL(FG)	Sarasota Bay	2009	bay	Rossman et al. 2015
Chordata	Clupeidae	Fish	Threafin herring	Opisthonema oglinum	Planktivore	11	9.2	0.4	11	-17.5	1.7	FL(FG)	Sarasota Bay	2009	bay	Rossman et al. 2015
Chordata	Clupeidae	Fish	Gulf menhaden	Brevoortia patronus	Planktivore	9	10.8	0.8	9	-20.6	1.9	LA	Terrebonne Bay	2005	shelf	Senn et al. 2010
Chordata	Clupeidae	Fish	Gulf menhaden	Brevoortia patronus	Planktivore				10	-18.5		TX	Alazan Bay	1991	bay	Street et al. 1997
Chordata	Clupeidae	Fish	Gulf menhaden	Brevoortia patronus	Planktivore	6	11.3		7	-21.3		MS	Graveline Bay Marsh	1988	salt marsh	Sullivan and Moncreiff 1990
Chordata	Clupeidae	Fish	Scaled herring	Harengula jaguana	Planktivore	1	12.1		1	-17.8		MS	Graveline Bay Marsh	1988	salt marsh	Sullivan and Moncreiff 1990
Chordata	Clupeidae	Fish	Gulf menhaden	Brevoortia patronus	Planktivore	2	12	0.3	2	-17.1	0.1	FL(FG)	Florida Big Bend, St. Joseph's Bay	2007	bay	Wilson et al. 2013
Chordata	Clupeidae	Fish	Scaled herring	Harengula jaguana	Planktivore	2	11.7	0.6	2	-17.8	0.2	FL(FG)	Florida Big Bend, St. Joseph's Bay	2007	bay	Wilson et al. 2013
Chordata	Clupeidae	Fish	Scaled herring	Harengula jaguana	Planktivore				4	-19.1	0.2	FL(FG)	Apalachicola Bay	2010	bay	Wilson et al. 2015
Chordata	Clupeidae	Fish	Gulf menhaden	Brevoortia patronus	Planktivore	4	14.47	0.42	4	-20.5	1.6	TX	Mad Island Marsh Preserve	1999	salt marsh	Winemiller et al. 2007
Chordata	Engraulidae	Fish	Bay anchovy	Anchoa mitchilli	Planktivore	1	11.9		1	-21.2		FL(FG)	Cedar Key	2008	salt marsh	Baker et al. 2013
Chordata	Engraulidae	Fish	Bay anchovy	Anchoa mitchilli	Planktivore	1	12.7		1	-20.5		LA	Barataria Bay	2008	salt marsh	Baker et al. 2013
Chordata	Engraulidae	Fish	Bay anchovy	Anchoa mitchilli	Planktivore	3	12.9	0.173205	3	-20.6	0.519615	LA	Timbalier Bay	2008	salt marsh	Baker et al. 2013
Chordata	Engraulidae	Fish	Bay anchovy	Anchoa mitchilli	Planktivore	1	12.1		1	-21.3		NC	Pamilico Sound	2008	salt marsh	Baker et al. 2013
Chordata	Engraulidae	Fish	Bay anchovy	Anchoa mitchilli	Planktivore	2	13.5	0.494975	2	-18.4	0.141421	TX	Galveston Bay	2008	salt marsh	Baker et al. 2013
Chordata	Engraulidae	Fish	Bay anchovy	Anchoa mitchilli	Planktivore	3	13.7	0.519615	3	-21.6	1.03923	TX	Sabine Lake	2008	salt marsh	Baker et al. 2013
Chordata	Engraulidae	Fish	Bay anchovy	Anchoa mitchilli	Planktivore	38	16.2037	0.863141	38	-19.3971	0.737915	VA	Chesapeake Bay, spring & fall, 2006 & 2007	2006	bay	Buchheister and Latour 2011
Chordata	Engraulidae	Fish	Bay anchovy	Anchoa mitchilli	Planktivore				23	-20.1478		FL(FG)	Apalachicola Bay, Cat point & Dry bar	1992	bay	Chanton and Lewis 2002
Chordata	Engraulidae	Fish	Anchovy	Anchoa mitchilli, Anchoa hespetus	Planktivore	27	13.13	1.49666	27	-19.8126	0.134713	NC	Core sound	2007	shelf	Deehr et al. 2014
Chordata	Engraulidae	Fish	Anchovy	Anchoa spp	Planktivore	11	13.59	0.51	11	-21.96	1.36	AL	shelf	2008	shelf	Drymon et al. 2012
Chordata	Engraulidae	Fish	Bay anchovy	Anchoa mitchilli	Planktivore	19	12.7	1.04614	19	-21.6	1.22049	LA	Terrebonne Bay	2000	bay	Duque 2004
Chordata	Engraulidae	Fish	Bay anchovy	Anchoa mitchilli	Planktivore	119	14.8		119	-19.1		MS	Mississippi Sound, Horn Island seagrass beds	1991	shelf	Moncreiff and Sullivan 2001
Chordata	Engraulidae	Fish	Longnose anchovy	Anchoa nasus	Planktivore	24	14.3		24	-18.4		MS	Mississippi Sound, Horn Island seagrass beds	1991	shelf	Moncreiff and Sullivan 2001
Chordata	Engraulidae	Fish	Bay anchovy	Anchoa mitchilli	Planktivore	10	13.43	1.13842	10	-21	1.86574	TX	Lavaca Bay	2006	bay	Oakley et al. 2014
Chordata	Engraulidae	Fish	Bay anchovy	Anchoa mitchilli	Planktivore	10	13.1	0.5	10	-21.3	0.6	MS	Mississippi Sound	2010	shelf	Olsen et al. 2014
Chordata	Engraulidae	Fish	Bay anchovy	Anchoa mitchilli	Planktivore				18	-18.1707	1.44871	VA	Chesapeake Bay	1999	bay	Pruell et al. 2003
Chordata	Engraulidae	Fish	Bay anchovy	Anchoa mitchilli	Planktivore	7	13.1	1	7	-19	2.2	LA	Terrebonne Bay	2005	shelf	Senn et al. 2010
Chordata	Engraulidae	Fish	Bay anchovy	Anchoa mitchilli	Planktivore	84	13.33	0.555562	84	-21.3367	1.59335	LA	Barataria Bay, artificial reef and mud bottom	2005	bay	Simonsen and Cowan 2013
Chordata	Engraulidae	Fish	Bay anchovy	Anchoa mitchilli	Planktivore	2	12		3	-20.6		MS	Graveline Bay Marsh	1988	salt marsh	Sullivan and Moncreiff 1990
Chordata	Engraulidae	Fish	Longnose anchovy	Anchoa nasus	Planktivore	1	12.4		1	-19.5		MS	Graveline Bay Marsh	1988	salt marsh	Sullivan and Moncreiff 1990
Chordata	Engraulidae	Fish	Bay anchovy	Anchoa mitchilli	Planktivore	26	14.3	0.8	21	-20	0.8	FL(FG)	Apalachicola Bay	1992	bay	Wilson et al. 2009
Chordata	Engraulidae	Fish	Bay anchovy	Anchoa mitchilli	Planktivore				2	-17.9	0.2	FL(FG)	Apalachicola Bay	2010	bay	Wilson et al. 2015
Chordata	Engraulidae	Fish	Bay anchovy	Anchoa mitchilli	Planktivore	9	12.8	0.85	9	-20.3	0.4	TX	Mad Island Marsh Preserve	1999	salt marsh	Winemiller et al. 2007
Chordata	Haemulidae	Fish	Tomtate grunt	Haemulon aurolineatum	Benthophagous				10	-18	0.254951	FL(FG)	Florida Big Bend, St. Joseph's Bay to Cedar Key	2007	shelf	Nelson et al. 2012
Chordata	Haemulidae	Fish	Tomtate grunt	Haemulon aurolineatum	Benthophagous	40	10.5	0.9	40	-16.6	0.7	FL(FG)	West Florida shelf, Big Bend Area	2010	shelf	Radabaugh and Peebles 2014
Chordata	Haemulidae	Fish	White grunt	Haemulon plumierii	Benthophagous	36	10.5	0.4	36	-16.2	0.4	FL(FG)	West Florida shelf, Big Bend Area	2010	shelf	Radabaugh and Peebles 2014
Chordata	Haemulidae	Fish	Tomtate grunt	Haemulon aurolineatum	Benthophagous	6	10	0.587878	6	-15.9	0.489898	NC	Onslow and Long Bay	1990	bay	Thomas and Cahoon 1993
Chordata	Mugilidae	Fish	Flathead grey mullet	Mugil cephalus	Planktivore	4	8.725	0.403113	4	-15.875	1.25797	FL(FG)	Cedar Key	2008	salt marsh	Baker et al. 2013
Chordata	Mugilidae	Fish	Flathead grey mullet	Mugil cephalus	Planktivore	3	8.7	0.34641	3	-15.2	0.173205	LA	Timbalier Bay	2008	salt marsh	Baker et al. 2013
Chordata	Mugilidae	Fish	Flathead grey mullet	Mugil cephalus	Planktivore	2	7.9	2.96985	2	-19.3	1.62635	MS	Bay St. Louis	2008	salt marsh	Baker et al. 2013
Chordata	Mugilidae	Fish	Flathead grey mullet	Mugil cephalus	Planktivore	1	7.8		1	-15.2		TX	Galveston Bay	2008	salt marsh	Baker et al. 2013
Chordata	Mugilidae	Fish	Flathead grey mullet	Mugil cephalus	Planktivore	3	10.3	1.55885	3	-18.8	0.34641	TX	Sabine Lake	2008	salt marsh	Baker et al. 2013
Chordata	Mugilidae	Fish	White mullet	Mugil curema	Planktivore	3	6.3	0.173205	3	-13.4	0.34641	TX	Aransas Bay	2008	salt marsh	Baker et al. 2013
Chordata	Mugilidae	Fish	White mullet	Mugil curema	Planktivore	2	8.5		2	-14.9		TX	Galveston Bay	2008	salt marsh	Baker et al. 2013
Chordata	Mugilidae	Fish	Flathead grey mullet	Mugil cephalus	Planktivore	3	10.1	2.07846	3	-18	0.69282	LA	Lower Barataria Bay	2003	bay	Fry and Chuchal 2012
Chordata	Mugilidae	Fish	Flathead grey mullet	Mugil cephalus	Planktivore	3	9.2		3	-14.6		MS	Mississippi Sound, Horn Island seagrass beds	1991	shelf	Moncreiff and Sullivan 2001
Chordata	Mugilidae	Fish	White mullet	Mugil curema	Planktivore	6	9.6		6	-15.7		MS	Mississippi Sound, Horn Island seagrass beds	1991	shelf	Moncreiff and Sullivan 2001
Chordata	Mugilidae	Fish	Flathead grey mullet	Mugil cephalus	Planktivore	4	9.36	2.64	4	-16.14	1.88	TX	Lavaca Bay	2006	bay	Oakley et al. 2014
Chordata	Mugilidae	Fish	Flathead grey mullet	Mugil cephalus	Planktivore	11	8.58182	0.57735	11	-18.3545	3.49603	FL(FG)	South-central Coast, Caloosahatchee estuary, Dry and wet season	2006	estuary	Olin et al. 2012
Chordata	Mugilidae	Fish	Flathead grey mullet	Mugil cephalus	Planktivore	1	5.74		1	-14.57		FL(FG)	South-central Coast, Myakka estuary	2006	estuary	Olin et al. 2012
Chordata	Mugilidae	Fish	Flathead grey mullet, White mullet	Mugil cephalus, Mugil curema	Planktivore	5	5.99	0.83	5	-12.33	1.56	FL(FG)	Sarasota Bay	2000	bay	Reynolds et al. 2001
Chordata	Mugilidae	Fish	Mullet	Mugil spp	Planktivore	10	10.64	1.18603	10	-15.41	2.72886	TX	Nueces Bay	2014	salt marsh	Rezek et al. 2017
Chordata	Mugilidae	Fish	Flathead grey mullet	Mugil cephalus	Planktivore	15	9.9	4	15	-12.9	1.6	FL(FG)	Sarasota Bay	2009	bay	Rossman et al. 2015
Chordata	Mugilidae	Fish	Flathead grey mullet	Mugil cephalus	Planktivore				3	-13.5		TX	Alazan Bay	1991	bay	Street et al. 1997
Chordata	Mugilidae	Fish	Flathead grey mullet	Mugil cephalus	Planktivore				2	-12.9		TX	Laguna Madre	1991	bay	Street et al. 1997
Chordata	Mugilidae	Fish	Flathead grey mullet	Mugil cephalus	Planktivore	1	8		7	-18.9		MS	Graveline Bay Marsh	1988	salt marsh	Sullivan and Moncreiff 1990
Chordata	Mugilidae	Fish	Flathead grey mullet	Mugil cephalus	Planktivore	8	10.45	1.8	8	-17.4	0.9	TX	Mad Island Marsh Preserve	1999	salt marsh	Winemiller et al. 2007
Chordata	Paralichthyidae	Fish	Summer flounder	Paralichthys dentatus	Piscivore	1	15.16					NC	Neuse River estuary	2002	estuary	Bucci et al. 2007a
Chordata	Paralichthyidae	Fish	Summer flounder	Paralichthys dentatus	Piscivore	43	15.9472	0.945118	43	-18.0519	0.929881	VA	Chesapeake Bay, spring & fall, 2006 & 2007	2006	bay	Buchheister and Latour 2011
Chordata	Paralichthyidae	Fish	Flounder	Paralichthys spp	Piscivore				4	-19.825		FL(FG)	Apalachicola Bay, Cat point & Dry bar	1992	bay	Chanton and Lewis 2002
Chordata	Paralichthyidae	Fish	Fringed flounder	Etropus crossotus	Piscivore				2	-19.75		FL(FG)	Apalachicola Bay, Cat point & Dry bar	1992	bay	Chanton and Lewis 2002
Chordata	Paralichthyidae	Fish	Flounder	Paralichthys spp	Piscivore	4	11.015	0.387921	4	-17.355	0.608595	NC	Core sound	2007	shelf	Deehr et al. 2014
Chordata	Paralichthyidae	Fish	Gulf flounder	Paralichthys albigutta	Piscivore				5	-16.1	1.5	FL(FG)	Florida Big Bend, St. Joseph's Bay to Cedar Key	2007	shelf	Nelson et al. 2012
Chordata	Paralichthyidae	Fish	Southern flounder	Paralichthys lethostigma	Piscivore	1	10.36		1	-16.54		TX	Lavaca Bay	2006	bay	Oakley et al. 2014
Chordata	Paralichthyidae	Fish	Dusky flounder	Syacium papillosum	Benthophagous	324	9.1	0.9	324	-17.5	1	FL(FG)	West Florida shelf, Big Bend Area	2010	shelf	Radabaugh et al. 2013
Chordata	Paralichthyidae	Fish	Southern flounder	Paralichthys lethostigma	Piscivore	1	10.8		1	-19.9		LA	Terrebonne Bay	2005	shelf	Senn et al. 2010
Chordata	Paralichthyidae	Fish	Southern flounder	Paralichthys lethostigma	Piscivore	2	9.7		6	-20		MS	Graveline Bay Marsh	1988	salt marsh	Sullivan and Moncreiff 1990
Chordata	Paralichthyidae	Fish	Southern flounder	Paralichthys lethostigma	Piscivore	10	12.91	1.26	10	-18.47	3.23	NC	Core sound	2007	shelf	Wallace et al. 2009
Chordata	Paralichthyidae	Fish	Flounder	Paralichthys spp	Piscivore	7	14.5	0.8	4	-20	0.9	FL(FG)	Apalachicola Bay	1992	bay	Wilson et al. 2009
Chordata	Paralichthyidae	Fish	Gulf flounder	Paralichthys albigutta	Piscivore	9	6.2	2.1	9	-17.4	0.9	FL(FG)	Florida Big Bend, St. Marks	2007	bay	Wilson et al. 2013
Chordata	Paralichthyidae	Fish	Gulf flounder	Paralichthys albigutta	Piscivore	12	10	1.1	12	-15	1.2	FL(FG)	Florida Big Bend, St. George Sound	2007	bay	Wilson et al. 2013
Chordata	Paralichthyidae	Fish	Gulf flounder	Paralichthys albigutta	Piscivore	2	12.4	1.4	2	-15.5	2.4	FL(FG)	Florida Big Bend, St. Joseph's Bay	2007	bay	Wilson et al. 2013
Chordata	Paralichthyidae	Fish	Southern flounder	Paralichthys lethostigma	Piscivore	2	13.22	1.68	2	-18.5	0.1	TX	Mad Island Marsh Preserve	1999	salt marsh	Winemiller et al. 2007
Chordata	Paralichthyidae	Fish	Summer flounder/Flathead catfish	Paralichthys dentatus/Pylodictis olivaris	Piscivore	3	12.35	0.49				NC	Alligator River estuary	2002	estuary	Bucci et al. 2007a
Chordata	Phycidae	Fish	Spotted hake	Urophycis regia	Piscivore	4	15.79	0.4	4	-18.83	0.14	VA	Chesapeake Bay, spring 2006	2006	bay	Buchheister and Latour 2011
Chordata	Phycidae	Fish	Spotted hake	Urophycis regia	Piscivore				1	-17.8		NC	Phillips Island, Newport River estuary	1975	estuary	Thayer et al. 1978
Chordata	Phycidae	Fish	Spotted hake	Urophycis regia	Piscivore				1	-18.2		NC	Phillips Island, Newport River estuary	1975	estuary	Thayer et al. 1978
Chordata	Pomatomidae	Fish	Bluefish	Pomatomus saltatrix	Piscivore	5	14.3	0.8	5	-17.606	0.1579	NC	Core sound	2007	shelf	Deehr et al. 2014
Chordata	Pomatomidae	Fish	Bluefish	Pomatomus saltatrix	Piscivore	1	15.27		1	-17.23		TX	Lavaca Bay	2006	bay	Oakley et al. 2014
Chordata	Sciaenidae	Fish	Atlantic croaker	Micropogonias undulatus	Benthophagous	14	15.5814	1.26219	14	-19.2971	1.14385	VA	Chesapeake Bay, fall 2006 & 2007	2006	bay	Buchheister and Latour 2011
Chordata	Sciaenidae	Fish	Spot croaker	Leiostomus xanthurus	Benthophagous	22	14.8482	1.26197	22	-18.3073	1.90321	VA	Chesapeake Bay, spring 2006 & 2007 & fall 2006	2006	bay	Buchheister and Latour 2011
Chordata	Sciaenidae	Fish	Weakfish	Cynoscion regalis	Benthophagous	16	15.6075	0.550818	16	-18.9175	0.470785	VA	Chesapeake Bay, spring 2007 & fall 2006 & 2007	2006	bay	Buchheister and Latour 2011
Chordata	Sciaenidae	Fish	American silver perch	Bairdiella chrysoura	Benthophagous				12	-19.6333		FL(FG)	Apalachicola Bay, Cat point & Dry bar	1992	bay	Chanton and Lewis 2002
Chordata	Sciaenidae	Fish	Atlantic croaker	Micropogonias undulatus	Benthophagous				16	-19.65		FL(FG)	Apalachicola Bay, Cat point & Dry bar	1992	bay	Chanton and Lewis 2002
Chordata	Sciaenidae	Fish	Sand weakfish	Cynoscion arenarius	Benthophagous				6	-20.05		FL(FG)	Apalachicola Bay, Cat point & Dry bar	1992	bay	Chanton and Lewis 2002
Chordata	Sciaenidae	Fish	Spot croaker	Leiostomus xanthurus	Benthophagous				16	-19.1938		FL(FG)	Apalachicola Bay, Cat point & Dry bar	1992	bay	Chanton and Lewis 2002
Chordata	Sciaenidae	Fish	Atlantic croaker	Micropogonias undulatus	Benthophagous	2	12.27	0.0424264	2	-18.94	0.5053	NC	Core sound	2007	shelf	Deehr et al. 2014
Chordata	Sciaenidae	Fish	Southern kingcroacker	Menticirrhus americanus	Benthophagous	1	12.3					NC	Core sound	2007	shelf	Deehr et al. 2014
Chordata	Sciaenidae	Fish	Spot croaker	Leiostomus xanthurus	Benthophagous	22	11.1664	0.555878	22	-16.5255	0.190647	NC	Core sound	2007	shelf	Deehr et al. 2014
Chordata	Sciaenidae	Fish	Atlantic croaker	Micropogonias undulatus	Benthophagous	69	12.57	0.71	69	-19.13	1.05	AL	shelf	2008	shelf	Drymon et al. 2012
Chordata	Sciaenidae	Fish	Atlantic croaker	Micropogonias undulatus	Benthophagous	14	11.8	1.49666	14	-21.1	1.87083	LA	Lower Barataria Bay	2003	bay	Fry and Chuchal 2012
Chordata	Sciaenidae	Fish	Spot croaker	Leiostomus xanthurus	Benthophagous	16	12.5	1.6	16	-21.1	2.4	LA	Lower Barataria Bay	2003	bay	Fry and Chuchal 2012
Chordata	Sciaenidae	Fish	Northern kingcroacker	Menticirrhus saxatillis	Benthophagous	3	9.4	0.69282	3	-14.3	0.34641	VA	Egging Marsh	1997	ocean	Knoff et al. 2001
Chordata	Sciaenidae	Fish	Southern kingcroacker	Menticirrhus americanus	Benthophagous	3	13.2	0.34641	3	-17.8	0.34641	VA	Egging Marsh	1997	ocean	Knoff et al. 2001
Chordata	Sciaenidae	Fish	Spot croaker	Leiostomus xanthurus	Benthophagous	1	12.9		1	-12.5		VA	Egging Marsh	1997	ocean	Knoff et al. 2001
Chordata	Sciaenidae	Fish	Atlantic croaker	Micropogonias undulatus	Benthophagous	5	13.4		5	-16.5		MS	Mississippi Sound, Horn Island seagrass beds	1991	shelf	Moncreiff and Sullivan 2001
Chordata	Sciaenidae	Fish	Spot croaker	Leiostomus xanthurus	Benthophagous	4	13.5		4	-17.4		MS	Mississippi Sound, Horn Island seagrass beds	1991	shelf	Moncreiff and Sullivan 2001
Chordata	Sciaenidae	Fish	Spotted weakfish	Cynoscion nebulosus	Benthophagous	3	14.6		3	-17.5		MS	Mississippi Sound, Horn Island seagrass beds	1991	shelf	Moncreiff and Sullivan 2001
Chordata	Sciaenidae	Fish	American silver perch	Bairdiella chrysoura	Benthophagous				5	-17.5	1.3	FL(FG)	Florida Big Bend, St. Joseph's Bay to Cedar Key	2007	shelf	Nelson et al. 2012
Chordata	Sciaenidae	Fish	Atlantic croaker	Micropogonias undulatus	Benthophagous				5	-17.3	1.3	FL(FG)	Florida Big Bend, St. Joseph's Bay to Cedar Key	2007	shelf	Nelson et al. 2012
Chordata	Sciaenidae	Fish	Spot croaker	Leiostomus xanthurus	Benthophagous				5	-15.9	0.9	FL(FG)	Florida Big Bend, St. Joseph's Bay to Cedar Key	2007	shelf	Nelson et al. 2012
Chordata	Sciaenidae	Fish	Spotted weakfish	Cynoscion nebulosus	Benthophagous				5	-16.6	0.7	FL(FG)	Florida Big Bend, St. Joseph's Bay to Cedar Key	2007	shelf	Nelson et al. 2012
Chordata	Sciaenidae	Fish	American silver perch	Bairdiella chrysoura	Benthophagous	5	16.16	2.48204	5	-18.79	1.76649	TX	Lavaca Bay	2006	bay	Oakley et al. 2014
Chordata	Sciaenidae	Fish	Atlantic croaker	Micropogonias undulatus	Benthophagous	13	12.82	1.33405	13	-17.37	1.69461	TX	Lavaca Bay	2006	bay	Oakley et al. 2014
Chordata	Sciaenidae	Fish	Gulf kingcroacker	Menticirrhus littoralis	Benthophagous	13	13.94	0.865332	13	-17.08	1.26194	TX	Lavaca Bay	2006	bay	Oakley et al. 2014
Chordata	Sciaenidae	Fish	Sand weakfish	Cynoscion arenarius	Benthophagous	7	15.2	0.396863	7	-18.12	0.74081	TX	Lavaca Bay	2006	bay	Oakley et al. 2014
Chordata	Sciaenidae	Fish	Spot croaker	Leiostomus xanthurus	Benthophagous	16	13.78	1.68	16	-19.36	2.12	TX	Lavaca Bay	2006	bay	Oakley et al. 2014
Chordata	Sciaenidae	Fish	Spotted weakfish	Cynoscion nebulosus	Benthophagous	12	13.71	2.45951	12	-17.45	2.39023	TX	Lavaca Bay	2006	bay	Oakley et al. 2014
Chordata	Sciaenidae	Fish	Sand weakfish	Cynoscion arenarius	Benthophagous	8	11.15	0.208167	8	-22.525	0.416333	FL(FG)	South-central Coast, Myakka estuary, Dry and wet season	2008	estuary	Olin et al. 2013
Chordata	Sciaenidae	Fish	Southern kingcroacker	Menticirrhus americanus	Benthophagous	8	10.3125	0.439697	8	-22.3625	0.541603	FL(FG)	South-central Coast, Myakka estuary, Dry and wet season	2008	estuary	Olin et al. 2013
Chordata	Sciaenidae	Fish	Atlantic croaker	Micropogonias undulatus	Benthophagous				10	-18.9756	2.39099	VA	Chesapeake Bay	1999	bay	Pruell et al. 2003
Chordata	Sciaenidae	Fish	Spot croaker	Leiostomus xanthurus	Benthophagous				12	-17.5976	0.929393	VA	Chesapeake Bay	1999	bay	Pruell et al. 2003
Chordata	Sciaenidae	Fish	Weakfish	Cynoscion regalis	Benthophagous				17	-17.9024	1.91071	VA	Chesapeake Bay	1999	bay	Pruell et al. 2003
Chordata	Sciaenidae	Fish	Spot croaker	Leiostomus xanthurus	Benthophagous	1	5.8		1	-11.98		FL(FG)	Sarasota Bay	2000	bay	Reynolds et al. 2001
Chordata	Sciaenidae	Fish	Atlantic croaker	Micropogonias undulatus	Benthophagous	4	15.375	0.3	4	-17.05	0.8	TX	Nueces Bay	2014	salt marsh	Rezek et al. 2017
Chordata	Sciaenidae	Fish	Spot croaker	Leiostomus xanthurus	Benthophagous	24	10.3	1.4	24	-16.7	2.1	FL(FG)	Sarasota Bay	2009	bay	Rossman et al. 2015
Chordata	Sciaenidae	Fish	Spotted weakfish	Cynoscion nebulosus	Benthophagous	27	11.5	1.7	27	-14.3	1.7	FL(FG)	Sarasota Bay	2009	bay	Rossman et al. 2015
Chordata	Sciaenidae	Fish	Spotted weakfish	Cynoscion nebulosus	Benthophagous	4	13	0.9	4	-19.1	1.5	LA	Terrebonne Bay	2005	shelf	Senn et al. 2010
Chordata	Sciaenidae	Fish	Atlantic croaker	Micropogonias undulatus	Benthophagous	243	13.0313	1.28601	243	-18.4992	1.51697	LA	Barataria Bay, artificial reef and mud bottom	2005	bay	Simonsen and Cowan 2013
Chordata	Sciaenidae	Fish	Spotted weakfish	Cynoscion nebulosus	Benthophagous	89	14.174	0.857813	89	-19.779	1.0061	LA	Barataria Bay, artificial reef and mud bottom	2005	bay	Simonsen and Cowan 2013
Chordata	Sciaenidae	Fish	American silver perch	Bairdiella chrysoura	Benthophagous				1	-17.1		TX	Alazan Bay	1991	bay	Street et al. 1997
Chordata	Sciaenidae	Fish	Spot croaker	Leiostomus xanthurus	Benthophagous				4	-10		TX	Laguna Madre	1991	bay	Street et al. 1997
Chordata	Sciaenidae	Fish	Spotted weakfish	Cynoscion nebulosus	Benthophagous				6	-15.4		TX	Alazan Bay	1991	bay	Street et al. 1997
Chordata	Sciaenidae	Fish	American silver perch	Bairdiella chrysoura	Benthophagous	29	12.1	1.6	29	-18	1.7	FL(FG)	Suwannee Sound and Cedar Key Estuary	1998	estuary	Sulak et al. 2012
Chordata	Sciaenidae	Fish	Atlantic croaker	Micropogonias undulatus	Benthophagous	4	14.1	0.3	4	-20.3	0.8	FL(FG)	Suwannee Sound and Cedar Key Estuary	1998	estuary	Sulak et al. 2012
Chordata	Sciaenidae	Fish	Spotted weakfish	Cynoscion nebulosus	Benthophagous	19	12.4	1.8	19	-17.2	1.9	FL(FG)	Suwannee Sound and Cedar Key Estuary	1998	estuary	Sulak et al. 2012
Chordata	Sciaenidae	Fish	American silver perch	Bairdiella chrysoura	Benthophagous	4	12.2		7	-19.4		MS	Graveline Bay Marsh	1988	salt marsh	Sullivan and Moncreiff 1990
Chordata	Sciaenidae	Fish	American star drum	Stellifer lanceolatus	Benthophagous	1	10.2		1	-20.8		MS	Graveline Bay Marsh	1988	salt marsh	Sullivan and Moncreiff 1990
Chordata	Sciaenidae	Fish	Atlantic croaker	Micropogonias undulatus	Benthophagous	6	10.2		13	-22.4		MS	Graveline Bay Marsh	1988	salt marsh	Sullivan and Moncreiff 1990
Chordata	Sciaenidae	Fish	Kingcroacker	Menticirrhus spp	Benthophagous	1	11.1		1	-18.8		MS	Graveline Bay Marsh	1988	salt marsh	Sullivan and Moncreiff 1990
Chordata	Sciaenidae	Fish	Sand weakfish	Cynoscion arenarius	Benthophagous	2	11		2	-20.4		MS	Graveline Bay Marsh	1988	salt marsh	Sullivan and Moncreiff 1990
Chordata	Sciaenidae	Fish	Spot croaker	Leiostomus xanthurus	Benthophagous	7	11.2		7	-21		MS	Graveline Bay Marsh	1988	salt marsh	Sullivan and Moncreiff 1990
Chordata	Sciaenidae	Fish	Spotted weakfish	Cynoscion nebulosus	Benthophagous	1	11.8		11	-20.7		MS	Graveline Bay Marsh	1988	salt marsh	Sullivan and Moncreiff 1990
Chordata	Sciaenidae	Fish	American silver perch	Bairdiella chrysoura	Benthophagous				1	-17.2		NC	Phillips Island, Newport River estuary	1975	estuary	Thayer et al. 1978
Chordata	Sciaenidae	Fish	Spot croaker	Leiostomus xanthurus	Benthophagous	8	12.37	1.47	8	-16.77	2.77	NC	Core sound	2007	shelf	Wallace et al. 2009
Chordata	Sciaenidae	Fish	American silver perch	Bairdiella chrysoura	Benthophagous	17	15	1.4	10	-19.6	1.3	FL(FG)	Apalachicola Bay	1992	bay	Wilson et al. 2009
Chordata	Sciaenidae	Fish	Atlantic croaker	Micropogonias undulatus	Benthophagous	30	13.8	0.7	16	-19.3	1.3	FL(FG)	Apalachicola Bay	1992	bay	Wilson et al. 2009
Chordata	Sciaenidae	Fish	Sand weakfish	Cynoscion arenarius	Benthophagous	9	15.2	1.4	5	-19.9	0.4	FL(FG)	Apalachicola Bay	1992	bay	Wilson et al. 2009
Chordata	Sciaenidae	Fish	Spot croaker	Leiostomus xanthurus	Benthophagous	22	14.2	0.6	15	-19.1	1.1	FL(FG)	Apalachicola Bay	1992	bay	Wilson et al. 2009
Chordata	Sciaenidae	Fish	American silver perch	Bairdiella chrysoura	Benthophagous	10	9.6	0.8	10	-17	0.4	FL(FG)	Florida Big Bend, St. Marks	2007	bay	Wilson et al. 2013
Chordata	Sciaenidae	Fish	American silver perch	Bairdiella chrysoura	Benthophagous	18	12.2	1.2	18	-17.9	1.5	FL(FG)	Florida Big Bend, St. George Sound	2007	bay	Wilson et al. 2013
Chordata	Sciaenidae	Fish	American silver perch	Bairdiella chrysoura	Benthophagous	1	12.6		1	-16.1		FL(FG)	Florida Big Bend, St. Joseph's Bay	2007	bay	Wilson et al. 2013
Chordata	Sciaenidae	Fish	Atlantic croaker	Micropogonias undulatus	Benthophagous	6	10.9	1.1	6	-15.8	0.7	FL(FG)	Florida Big Bend, St. George Sound	2007	bay	Wilson et al. 2013
Chordata	Sciaenidae	Fish	Atlantic croaker	Micropogonias undulatus	Benthophagous	4	12.1	1.5	4	-15.3	2.5	FL(FG)	Florida Big Bend, St. Joseph's Bay	2007	bay	Wilson et al. 2013
Chordata	Sciaenidae	Fish	Sand weakfish	Cynoscion arenarius	Benthophagous	10	6.6	1	10	-16.8	0.7	FL(FG)	Florida Big Bend, St. Marks	2007	bay	Wilson et al. 2013
Chordata	Sciaenidae	Fish	Sand weakfish	Cynoscion arenarius	Benthophagous	3	11.6	0.4	3	-15.4	2.5	FL(FG)	Florida Big Bend, St. George Sound	2007	bay	Wilson et al. 2013
Chordata	Sciaenidae	Fish	Sand weakfish	Cynoscion arenarius	Benthophagous	3	13.2	0.5	3	-13.5	0.6	FL(FG)	Florida Big Bend, St. Joseph's Bay	2007	bay	Wilson et al. 2013
Chordata	Sciaenidae	Fish	Spot croaker	Leiostomus xanthurus	Benthophagous	8	11.6	0.9	8	-16.1	0.8	FL(FG)	Florida Big Bend, St. George Sound	2007	bay	Wilson et al. 2013
Chordata	Sciaenidae	Fish	Spot croaker	Leiostomus xanthurus	Benthophagous	1	13		1	-13.1		FL(FG)	Florida Big Bend, St. Joseph's Bay	2007	bay	Wilson et al. 2013
Chordata	Sciaenidae	Fish	American silver perch	Bairdiella chrysoura	Benthophagous	4	14.69	1.98	4	-19.3	0.5	TX	Mad Island Marsh Preserve	1999	salt marsh	Winemiller et al. 2007
Chordata	Sciaenidae	Fish	Spot croaker	Leiostomus xanthurus	Benthophagous	2	13.34	1.99	2	-13.5	0.1	TX	Mad Island Marsh Preserve	1999	salt marsh	Winemiller et al. 2007
Chordata	Sciaenidae	Fish	Spotted weakfish	Cynoscion nebulosus	Benthophagous	8	13.23	2.21	8	-19.4	0.6	TX	Mad Island Marsh Preserve	1999	salt marsh	Winemiller et al. 2007
Chordata	Sciaenidae	Fish	Atlantic croaker	Micropogonias undulatus	Benthophagous	63	15.5	0.404962	63	-19.2	1.61985	VA	Chesapeake Bay	2009	bay	Xu et al. 2013
Chordata	Sciaenidae	Fish	Spot croaker	Leiostomus xanthurus	Benthophagous	51	15.9	1.09308	51	-20.7	1.09308	VA	Chesapeake Bay	2009	bay	Xu et al. 2013
Chordata	Sparidae	Fish	Sheepshead	Archosargus probatocephalus	Benthophagous	1	7.42		1	-20.71		FL(FG)	Estero Bay, Estero River mouth	2008	bay	Abeels et al. 2012
Chordata	Sparidae	Fish	Pinfish	Lagodon rhomboides	Benthophagous				2	-17.7		FL(FG)	Apalachicola Bay, Cat point & Dry bar	1992	bay	Chanton and Lewis 2002
Chordata	Sparidae	Fish	Pinfish	Lagodon rhomboides	Benthophagous	5	9.722	0.907083	5	-13.742	0.422137	FL(FG)	Florida Bay, Rankin Basin	1997	bay	Chasar et al. 2005
Chordata	Sparidae	Fish	Pinfish	Lagodon rhomboides	Benthophagous	23	10.7104	0.526364	23	-17.9439	0.31053	NC	Core sound	2007	shelf	Deehr et al. 2014
Chordata	Sparidae	Fish	Pinfish	Lagodon rhomboides	Benthophagous	3	13.4	1.90526	3	-18.8	0	LA	Lower Barataria Bay	2003	bay	Fry and Chuchal 2012
Chordata	Sparidae	Fish	Pinfish	Lagodon rhomboides	Benthophagous	13	11.8		13	-16.1		MS	Mississippi Sound, Horn Island seagrass beds	1991	shelf	Moncreiff and Sullivan 2001
Chordata	Sparidae	Fish	Pinfish	Lagodon rhomboides	Benthophagous				5	-17	1.4	FL(FG)	Florida Big Bend, St. Joseph's Bay to Cedar Key	2007	shelf	Nelson et al. 2012
Chordata	Sparidae	Fish	Pinfish	Lagodon rhomboides	Benthophagous	10	11.03	1.58114	10	-16.59	1.77088	TX	Lavaca Bay	2006	bay	Oakley et al. 2014
Chordata	Sparidae	Fish	Sheepshead	Archosargus probatocephalus	Benthophagous	6	13.09	1.86161	6	-18.57	1.81262	TX	Lavaca Bay	2006	bay	Oakley et al. 2014
Chordata	Sparidae	Fish	Pinfish	Lagodon rhomboides	Benthophagous	17	11.0235	1.37405	17	-19.2529	2.63919	FL(FG)	South-central Coast, Caloosahatchee estuary, Dry and wet season	2006	estuary	Olin et al. 2012
Chordata	Sparidae	Fish	Pinfish	Lagodon rhomboides	Benthophagous	14	9.68571	0.641613	14	-21.8857	1.64215	FL(FG)	South-central Coast, Myakka estuary, Dry and wet season	2006	estuary	Olin et al. 2012
Chordata	Sparidae	Fish	Littlehead porgy	Calamus proridens	Benthophagous	181	9.7	0.5	181	-16	0.8	FL(FG)	West Florida shelf, Big Bend Area	2010	shelf	Radabaugh et al. 2013
Chordata	Sparidae	Fish	Pinfish	Lagodon rhomboides	Benthophagous	81	9.7	0.9	81	-16.8	1	FL(FG)	West Florida shelf, Big Bend Area	2010	shelf	Radabaugh and Peebles 2014
Chordata	Sparidae	Fish	Pinfish	Lagodon rhomboides	Benthophagous	10	6.95	0.57	10	-13.23	1.26	FL(FG)	Sarasota Bay	2000	bay	Reynolds et al. 2001
Chordata	Sparidae	Fish	Pinfish	Lagodon rhomboides	Benthophagous	12	14.8667	0.83238	12	-17.7333	0.999285	TX	Nueces Bay	2014	salt marsh	Rezek et al. 2017
Chordata	Sparidae	Fish	Pinfish	Lagodon rhomboides	Benthophagous	27	8	1.3	27	-13.7	1.2	FL(FG)	Sarasota Bay	2009	bay	Rossman et al. 2015
Chordata	Sparidae	Fish	Pinfish	Lagodon rhomboides	Benthophagous	20	9	0.7	20	-16.1	1.2	FL(FG)	Sarasota Bay	2009	bay	Rossman et al. 2015
Chordata	Sparidae	Fish	Sheepshead	Archosargus probatocephalus	Benthophagous	15	9	0.8	15	-14.9	1.6	FL(FG)	Sarasota Bay	2009	bay	Rossman et al. 2015
Chordata	Sparidae	Fish	Pinfish	Lagodon rhomboides	Benthophagous				2	-13.4		TX	Alazan Bay	1991	bay	Street et al. 1997
Chordata	Sparidae	Fish	Pinfish	Lagodon rhomboides	Benthophagous				2	-13.3		TX	Laguna Madre	1991	bay	Street et al. 1997
Chordata	Sparidae	Fish	Pinfish	Lagodon rhomboides	Benthophagous	6	9.6	1.8	6	-19.1	2.4	FL(FG)	Suwannee Sound and Cedar Key Estuary	1998	estuary	Sulak et al. 2012
Chordata	Sparidae	Fish	Pinfish	Lagodon rhomboides	Benthophagous	4	10.1		7	-22		MS	Graveline Bay Marsh	1988	salt marsh	Sullivan and Moncreiff 1990
Chordata	Sparidae	Fish	Sheepshead	Archosargus probatocephalus	Benthophagous	6	10		6	-21.2		MS	Graveline Bay Marsh	1988	salt marsh	Sullivan and Moncreiff 1990
Chordata	Sparidae	Fish	Red porgy	Pagrus pagrus	Benthophagous	17	10.6	0.659697	17	-16.2	0.659697	NC	Onslow and Long Bay	1990	bay	Thomas and Cahoon 1993
Chordata	Sparidae	Fish	Spottail pinfish	Diplodus holbrooki	Benthophagous	30	11	0.821584	30	-17.7	0.657267	NC	Onslow and Long Bay	1990	bay	Thomas and Cahoon 1993
Chordata	Sparidae	Fish	Pinfish	Lagodon rhomboides	Benthophagous	10	5.7	1.7	10	-17.6	0.6	FL(FG)	Florida Big Bend, St. Marks	2007	bay	Wilson et al. 2013
Chordata	Sparidae	Fish	Pinfish	Lagodon rhomboides	Benthophagous	8	11.4	0.6	8	-17	1	FL(FG)	Florida Big Bend, St. George Sound	2007	bay	Wilson et al. 2013
Chordata	Sparidae	Fish	Pinfish	Lagodon rhomboides	Benthophagous	11	11.5	0.2	11	-15	0.7	FL(FG)	Florida Big Bend, St. Joseph's Bay	2007	bay	Wilson et al. 2013
Chordata	Sparidae	Fish	Pinfish	Lagodon rhomboides	Benthophagous	12	9.01	1.72	12	-16.9	1.4	TX	Mad Island Marsh Preserve	1999	salt marsh	Winemiller et al. 2007
Chordata	Synodontidae	Fish	Inshore lizardfish	Synodus foetens	Piscivore				10	-17.6	0.474342	FL(FG)	Florida Big Bend, St. Joseph's Bay to Cedar Key	2007	shelf	Nelson et al. 2012
Chordata	Synodontidae	Fish	Inshore lizardfish	Synodus foetens	Piscivore	226	11.2	0.8	226	-17.3	0.6	FL(FG)	West Florida shelf, Big Bend Area	2010	shelf	Radabaugh et al. 2013
Chordata	Synodontidae	Fish	Inshore lizardfish	Synodus foetens	Piscivore	4	11.6	0.4	4	-15	1.2	FL(FG)	Florida Big Bend, St. George Sound	2007	bay	Wilson et al. 2013
Chordata	Triglidae	Fish	Searobin	Prionotus spp	Benthophagous	11	13.04	0.41	11	-18.7	1.84	AL	shelf	2008	shelf	Drymon et al. 2012
Chordata	Triglidae	Fish	Bighead searobin	Prionotus tribulus	Benthophagous	8	11.4		8	-16.2		MS	Mississippi Sound, Horn Island seagrass beds	1991	shelf	Moncreiff and Sullivan 2001
Mollusca	Buccinidae	Gastropod	Tinted cantharus	Pisania tincta	Detritivore	54	12.6		54	-19.2		MS	Mississippi Sound, Horn Island seagrass beds	1991	shelf	Moncreiff and Sullivan 2001
Mollusca	Busyconidae	Gastropod	Lightning whelk	Busycon sinistrum	Carnivore	2	11.6		2	-17.1		MS	Mississippi Sound, Horn Island seagrass beds	1991	shelf	Moncreiff and Sullivan 2001
Mollusca	Busyconidae	Gastropod	Whelk spp	Busycon spp	Carnivore	10	9.41	0.57	10	-17.01	0.7	NC	Core sound	2007	shelf	Wallace et al. 2009
Mollusca	Calyptraeidae	Gastropod	Slipper snail	Crepidula convexa	Detritivore	3	8.86411	0.337961	3	-17.4012	0.840096	VA	Goodwin Island	2005	bay	Douglass et al. 2011
Mollusca	Calyptraeidae	Gastropod	Eastern white slipper snail	Crepidula plana	Suspension Feeder	177	8.7		177	-19.3		MS	Mississippi Sound, Horn Island seagrass beds	1991	shelf	Moncreiff and Sullivan 2001
Mollusca	Cerithiidae	Gastropod	Sea snail	Cerithium lutosum	Herbivore				5	-13.4		TX	Laguna Madre	1991	bay	Street et al. 1997
Mollusca	Cerithiidae	Gastropod	Sea snail	Ittibittium oryza	Detritivore				4	-15.3	0.79	NC	Phillips Island, Newport River estuary	1975	estuary	Thayer et al. 1978
Mollusca	Columbellidae	Gastropod	Sea snail	Astyris lunata	Detritivore				4	-15.5	0.52	NC	Phillips Island, Newport River estuary	1975	estuary	Thayer et al. 1978
Mollusca	Columbellidae	Gastropod	Sea snail	Costoanachis avara	Detritivore				6	-16	0.93	NC	Phillips Island, Newport River estuary	1975	estuary	Thayer et al. 1978
Mollusca	Littorinidae	Gastropod	Marsh periwinkle	Littorina irrorata	Herbivore	3	8.3	0.173205	3	-18	0.34641	FL(FG)	Cedar Key	2008	salt marsh	Baker et al. 2013
Mollusca	Littorinidae	Gastropod	Marsh periwinkle	Littorina irrorata	Herbivore	2	8.5	0.282843	2	-14	1.41421	LA	Barataria Bay	2008	salt marsh	Baker et al. 2013
Mollusca	Littorinidae	Gastropod	Marsh periwinkle	Littorina irrorata	Herbivore	3	9.4	0.173205	3	-16.7	0.34641	LA	Timbalier Bay	2008	salt marsh	Baker et al. 2013
Mollusca	Littorinidae	Gastropod	Marsh periwinkle	Littorina irrorata	Herbivore	3	5.8	0.866025	3	-19.3	3.81051	MS	Bay St. Louis	2008	salt marsh	Baker et al. 2013
Mollusca	Littorinidae	Gastropod	Marsh periwinkle	Littorina irrorata	Herbivore	1	3.8		1	-17		NC	Wrightsville Beach	2008	salt marsh	Baker et al. 2013
Mollusca	Littorinidae	Gastropod	Marsh periwinkle	Littorina irrorata	Herbivore	2	6.5	0.707107	2	-16.3	0.141421	NC	Newport River	2008	salt marsh	Baker et al. 2013
Mollusca	Littorinidae	Gastropod	Marsh periwinkle	Littorina irrorata	Herbivore	3	8	0.8	3	-15.6	3.81051	NC	Pamilico Sound	2008	salt marsh	Baker et al. 2013
Mollusca	Littorinidae	Gastropod	Marsh periwinkle	Littorina irrorata	Herbivore	3	8.7	0.34641	3	-14.5	0.69282	TX	Galveston Bay	2008	salt marsh	Baker et al. 2013
Mollusca	Littorinidae	Gastropod	Marsh periwinkle	Littorina irrorata	Herbivore	3	9.2	0.34641	3	-15.5	1.38564	TX	Sabine Lake	2008	salt marsh	Baker et al. 2013
Mollusca	Littorinidae	Gastropod	Marsh periwinkle	Littorina irrorata	Herbivore	4	3.15	0.685565	4	-16.025	0.65	NC	Port Marsh	1992	salt marsh	Currin et al. 1995
Mollusca	Littorinidae	Gastropod	Marsh periwinkle	Littorina irrorata	Herbivore	3	10.8	0.69282	3	-14.3	0.34641	VA	Egging Marsh	1997	salt marsh	Knoff et al. 2001
Mollusca	Littorinidae	Gastropod	Marsh periwinkle	Littorina spp	Herbivore	65	6.28615	0.616707	65	-14.7508	1.55527	LA	Barataria Bay	2013	bay	Olin et al. 2017
Mollusca	Littorinidae	Gastropod	Marsh periwinkle	Littorina irrorata	Herbivore	8	3.8	0.189	8	-15.6	0.877	MS	Grand Bay National Estuarine Research Reserve	2006	estuary	Rush et al. 2010
Mollusca	Littorinidae	Gastropod	Marsh periwinkle	Littorina irrorata	Herbivore	8	6.5	0.304	8	-20	0.62	MS	Pascagoula Marsh Coastal Preserve	2006	estuary	Rush et al. 2010
Mollusca	Littorinidae	Gastropod	Marsh periwinkle	Littorina irrorata	Herbivore				4	-21.6		MS	Graveline Bay Marsh	1988	salt marsh	Sullivan and Moncreiff 1990
Mollusca	Littorinidae	Gastropod	Common periwinkle	Littorina littorea	Herbivore				2	-18.8	5.4	AL	Mobile Bay	2010	bay	Wilson et al. 2015
Mollusca	Littorinidae	Gastropod	Common periwinkle	Littorina littorea	Herbivore				10	-16.1	1.6	LA	Barataria Bay	2010	bay	Wilson et al. 2015
Mollusca	Littorinidae	Gastropod	Marsh periwinkle	Littorina spp	Herbivore				1	-16.3		MS	Gulfport	2010	bay	Wilson et al. 2015
Mollusca	Melongenidae	Gastropod	Crown conch	Melongena corona	Omnivore				1	-21.8		FL(FG)	Apalachicola Bay, Dry bar	1992	bay	Chanton and Lewis 2002
Mollusca	Melongenidae	Gastropod	Crown conch	Melongena corona	Omnivore	1	4.3		1	-24.1		FL(FG)	Big Sable Creek	2012	bay	Denton et al. 2019
Mollusca	Melongenidae	Gastropod	Crown conch	Melongena corona	Omnivore	18	7.8	0.9	18	-19.9	2.2	FL(FG)	Florida Bay	2012	bay	Denton et al. 2019
Mollusca	Muricidae	Gastropod	Red-mouthed rock snail	Thais haemastoma	Carnivore	20	13.7		20	-16.6		MS	Mississippi Sound, Horn Island seagrass beds	1991	shelf	Moncreiff and Sullivan 2001
Mollusca	Muricidae	Gastropod	Atlantic oyster drill	Urosalpinx cinerea	Omnivore	16	12.24	0.219133	16	-17.7812	0.294215	LA	Barataria Bay, artificial reef and mud bottom	2007	bay	Simonsen 2008
Mollusca	Muricidae	Gastropod	Sea snail	Eupleura caudata	Detritivore				1	-16.6		NC	Phillips Island, Newport River estuary	1975	estuary	Thayer et al. 1978
Mollusca	Nassariidae	Gastropod	Eastern mudsnail	Ilyanassa obsoleta	Detritivore	3	7.06667	0.378594	3	-14.0667	1.02632	NC	Port Marsh	1992	salt marsh	Currin et al. 1995
Mollusca	Nassariidae	Gastropod	Bruised nassa	Nassarius vibex	Detritivore	79	14.1		79	-16.3		MS	Mississippi Sound, Horn Island seagrass beds	1991	shelf	Moncreiff and Sullivan 2001
Mollusca	Nassariidae	Gastropod	Bruised nassa	Nassarius vibex	Detritivore				1	-15.4		NC	Phillips Island, Newport River estuary	1975	estuary	Thayer et al. 1978
Mollusca	Naticidae	Gastropod	Atlantic moon snail	Polynices duplicatus	Carnivore	1	11.4		1	-16.5		MS	Mississippi Sound, Horn Island seagrass beds	1991	shelf	Moncreiff and Sullivan 2001
Mollusca	Naticidae	Gastropod	Atlantic moon snail	Polinices duplicatus	Carnivore	1	8.4		1	-18.1		MS	Graveline Bay Marsh	1988	salt marsh	Sullivan and Moncreiff 1990
Mollusca	Naticidae	Gastropod	Atlantic moon snail	Polinices duplicatus	Carnivore				1	-18.9		NC	Phillips Island, Newport River estuary	1975	estuary	Thayer et al. 1978
Mollusca	Neritidae	Gastropod	Olive nerite	Neritina usnea	Detritivore	22	7.4	0.253	22	-20.9	0.496	MS	Pascagoula Marsh Coastal Preserve	2006	estuary	Rush et al. 2010
Mollusca	Potamididae	Gastropod	Ladder horn snail	Cerithidea scalariformis	Detritivore	1	7.6		1	-19.1		FL(FG)	Florida Bay	2012	bay	Denton et al. 2019
Mollusca	Turbinidae	Gastropod	West Indian starsnail	Lithopoma tectum	Detritivore	6	4.46667	0.723625	6	-10.9667	1.25033	FL(FG)	Florida Bay, FL Keys	1997	neritic	Behringer and Butler 2006
Plant	Cladophoraceae	Macroalgae	Filamentous green algae	Cladophora spp	Photosynthesis	1	8.90507		1	-16.6667		VA	Goodwin Island	2006	bay	Douglass et al. 2011
Plant	Ceramiaceae	Macroalgae	Red algae	Ceramium spp	Photosynthesis	1	9.60243		1	-13.0661		VA	Goodwin Island	2006	bay	Douglass et al. 2011
Plant	Cladophoraceae	Macroalgae	Green algae	Chaetomorpha spp	Photosynthesis	1	6.6		1	-21.7		NC	Port Marsh	1992	salt marsh	Currin et al. 1995
Plant	Codiaceae	Macroalgae	Green sea fingers	Codium fragile	Photosynthesis	8	9.66	0.58	8	-15.34	1.25	VA	Virginia Coast Reserve LTER site	2010	bay	Hondula and Price 2014
Plant	Codiaceae	Macroalgae	Green sea fingers	Codium fragile	Photosynthesis				2	-13.475	0.0636396	NC	Pivers Island, Beaufort	1989	bay	Raven and Osmond 1992
Plant	Dictyotaceae	Macroalgae	Forkweed	Dictyota menstrualis	Photosynthesis				2	-16.67	0.0282843	NC	Pivers Island, Beaufort	1989	bay	Raven and Osmond 1992
Plant	Dictyotaceae	Macroalgae	Forkweed	Padina gymnospora	Photosynthesis				2	-19.68	0.183848	NC	Pivers Island, Beaufort	1989	bay	Raven and Osmond 1992
Plant	Ectocarpaceae	Macroalgae	Filamentous brown algae	Ectocarpus spp	Photosynthesis	1	7.58333		1	-16.25		VA	Goodwin Island	2006	bay	Douglass et al. 2011
Plant	Fucaceae	Macroalgae	Bladder rack	Fucus vesiculosus	Photosynthesis				2	-15.965	0.0494975	NC	Pivers Island, Beaufort	1989	bay	Raven and Osmond 1992
Plant	Gelidiaceae	Macroalgae	Red algae	Gelidium spp	Photosynthesis	3	7.84	0.07	3	-18.85	0.1	TX	Port Isabel	2007	bay	Gorga 2010
Plant	Gelidiaceae	Macroalgae	Red algae	Gelidium spp	Photosynthesis	3	10.07	0.11	3	-20.39	0.17	TX	Port Aransas	2007	bay	Gorga 2010
Plant	Gracilariaceae	Macroalgae	Red algae	Gracilaria spp	Photosynthesis				2	-20.3	0.565685	FL(FG)	Apalachicola Bay	1992	bay	Chanton and Lewis 2002
Plant	Gracilariaceae	Macroalgae	Red algae	Gracilaria spp	Photosynthesis	2	9.98477	0.146003	2	-17.1072	4.6584	VA	Goodwin Island	2005	bay	Douglass et al. 2011
Plant	Gracilariaceae	Macroalgae	Red algae	Gracilaria caudata	Photosynthesis	1	5.89815		1	-17.9174		TX	North Pass, Aransas Bay	1999	bay	Herzka et al. 2002
Plant	Gracilariaceae	Macroalgae	Red algae	Hydropuntia cornea	Photosynthesis	1	7.69995		1	-15.5372		TX	North Pass, Aransas Bay	1999	bay	Herzka et al. 2002
Plant	Gracilariaceae	Macroalgae	Red algae	Gracilaria vermicuphylla	Photosynthesis	16	8.77	2.18	16	-18.03	2.59	VA	Virginia Coast Reserve LTER site	2010	bay	Hondula and Price 2014
Plant	Gracilariaceae	Macroalgae	Red algae	Gracilaria spp	Photosynthesis	2	6.6		2	-13		FL(FG)	St. Joseph's Bay	2011	bay	Williams et al. 2014
Plant	Halymeniaceae	Macroalgae	Red algae	Grateloupia spp	Photosynthesis	10	6.77	0.664078	10	-20.53	1.67601	FL(FG)	Big Lagoon, FL and Fort Morgan, AL	2009	bay	Prado et al. 2012
Plant	Macroalgae	Macroalgae	Benthic algae	Unknown	Photosynthesis	16	4.9	4.2	16	-20.4	4.1	TX	Aransas National Wildlife Refuge	2004	salt marsh	Hoeinghau and Davis 2007
Plant	Macroalgae	Macroalgae	Macroalgae	Gracilaria spp, Ulva spp	Photosynthesis	2	7.4527		2	-18.9443		TX	lower Texas Coast, North Padre Island to Mexico border	2007	shelf	Howell et al. 2016
Plant	Macroalgae	Macroalgae	Macroalgae	Gracilaria spp, Ulva spp	Photosynthesis	2	9.21359		2	-18.7333		TX	middle Texas Coast, Colorado River through Mustang Island	2007	shelf	Howell et al. 2016
Plant	Macroalgae	Macroalgae	Epiphytic algae	Unidentified	Photosynthesis	4	5.9	0.9	4	-17.5	1.7	MS	Mississippi Sound, Horn Island seagrass beds	1991	shelf	Moncreiff and Sullivan 2001
Plant	Macroalgae	Macroalgae	Benthic algae	Unknown	Photosynthesis	85	4	0.8	85	-19.3	2.7	FL(FG)	West Florida shelf, Big Bend Area	2010	shelf	Radabaugh et al. 2013
Plant	Multiple	Macroalgae	Macroalgae	Ulva spp, Codium spp, Dictyota spp	Photosynthesis	7	5.8	0.148	7	-17.13	0.347	NC	Core sound	2007	shelf	Deehr et al. 2014
Plant	Multiple	Macroalgae	Macroalgae	Sargassum spp, Gracilaria spp	Photosynthesis	4	6.3	0.285	4	-19.27	0.829	NC	Core sound	2007	shelf	Deehr et al. 2014
Plant	Multiple	Macroalgae	Sea lettuce, filamentous algae	Ulva australis, miscellaneous macroalgae	Photosynthesis	129	4.81563	1.25279				FL(FG)	Sarasota Bay	1999	bay	Dillon and Chanton 2008
Plant	Multiple	Macroalgae	Red algae	Agardhiella subulata, Dictyota cervicornis, Gracilaria spp, Hypnea spp, Lomentaria baileyana, Solieria filiformis	Photosynthesis	118	4.68	1.57322				FL(FG)	Fort Myers, Pine Island Sound	2008	bay	Milbrandt et al. 2019
Plant	Multiple	Macroalgae	Red algae	Agardhiella subulata, Dictyota cervicornis, Gracilaria spp, Hypnea spp, Lomentaria baileyana, Solieria filiformis	Photosynthesis	63	6.12	1.70711				FL(FG)	Fort Myers, Gulf sites	2008	bay	Milbrandt et al. 2019
Plant	Solieriaceae	Macroalgae	Red algae	Agardhiella spp	Photosynthesis	6	11.0155	0.67814	6	-16.8534	0.399089	VA	Goodwin Island	2006	bay	Douglass et al. 2011
Plant	Solieriaceae	Macroalgae	Red algae	Agardhiella subulata	Photosynthesis	7	9.37	0.96	7	-18.84	2.88	VA	Virginia Coast Reserve LTER site	2010	bay	Hondula and Price 2014
Plant	Ulvaceae	Macroalgae	Sea lettuce	Ulva lactua	Photosynthesis				3	-20.2	1.3	FL(FG)	Apalachicola Bay	1992	bay	Chanton and Lewis 2002
Plant	Ulvaceae	Macroalgae	Sea lettuce	Ulva spp	Photosynthesis	1	8.1		1	-15.5		NC	Port Marsh	1992	salt marsh	Currin et al. 1995
Plant	Ulvaceae	Macroalgae	Sea lettuce	Ulva spp	Photosynthesis	1	8.75261		1	-17.0958		VA	Goodwin Island	2005	bay	Douglass et al. 2011
Plant	Ulvaceae	Macroalgae	Sea lettuce	Ulva spp	Photosynthesis	3	7.22	0.24	3	-19.01	0.1	TX	Port Isabel	2007	bay	Gorga 2010
Plant	Ulvaceae	Macroalgae	Sea lettuce	Ulva spp	Photosynthesis	3	8.52	0.12	3	-17.08	0.03	TX	Port Aransas	2007	bay	Gorga 2010
Plant	Ulvaceae	Macroalgae	Sea lettuce	Ulva lactuca	Photosynthesis	17	8.71	1.81	17	-20.76	2.67	VA	Virginia Coast Reserve LTER site	2010	bay	Hondula and Price 2014
Plant	Ulvaceae	Macroalgae	Sea lettuce	Enterpmoprha spp	Photosynthesis	1	8.8		1	-16.2		MS	Mississippi Sound, Horn Island seagrass beds	1991	shelf	Moncreiff and Sullivan 2001
Plant	Ulvaceae	Macroalgae	Sea lettuce	Ulva lactua	Photosynthesis	1	5.96		1	-18.54		TX	Lavaca Bay	2006	bay	Oakley et al. 2014
Plant	Ulvaceae	Macroalgae	Sea lettuce	Ulva spp	Photosynthesis	9	10.1	0.3				FL(FG)	Apalachicola Bay	2006	bay	Oczkowski et al. 2011
Plant	Ulvaceae	Macroalgae	Sea lettuce	Ulva spp	Photosynthesis	5	6.77	0.134164	5	-18.86	0.0447214	AL	Mobile Bay	2009	bay	Prado et al. 2012
Plant	Ulvaceae	Macroalgae	Sea lettuce	Ulva spp	Photosynthesis	3	8.4	0.069282	3	-15.4	1.54153	LA	Shoal and Seaward platform	2016	shelf	Reeves et al. 2019
Plant	Ulvaceae	Macroalgae	Sea lettuce	Ulva spp	Photosynthesis	2	5.5		2	-12.8		FL(FG)	St. Joseph's Bay	2011	bay	Williams et al. 2014
Plant	Ulvaceae	Macroalgae	Sea lettuce	Ulva spp	Photosynthesis	3	6.5	0.4	3	-20.2	0.2	TX	Mad Island Marsh Preserve	1999	salt marsh	Winemiller et al. 2007
Plant	Unidentified	Macroalgae	Filamentous brown algae	Unidentified	Photosynthesis	4	10.6	0.02	4	-20.5	0.3	LA	Shoal and Seaward platform	2016	shelf	Reeves et al. 2019
Plant	Unidentified	Macroalgae	Filamentous green algae	Unidentified	Photosynthesis	2	10.2	0.59397	2	-20	1.27279	LA	Shoal and Seaward platform	2016	shelf	Reeves et al. 2019
Plant	Unidentified	Macroalgae	Filamentous red algae	Unidentified	Photosynthesis	3	8.8	0.0519615	3	-19.6	3.16965	LA	Shoal and Seaward platform	2016	shelf	Reeves et al. 2019
Plant	Wrangeliaceae	Macroalgae	Red algae	Wrangelia spp	Photosynthesis				1	-21.6		FL(FG)	Apalachicola Bay	1992	bay	Chanton and Lewis 2002
Plant	Cymodoceaceae	Seagrass	Manatee grass	Syringodium filiforme	Photosynthesis	1	3.7		1	-8.4		FL(FG)	Florida Bay, Schooner Bank	1983	bay	Harrigan et al. 1989
Plant	Cymodoceaceae	Seagrass	Shoal grass	Halodule wrightii	Photosynthesis	1	3.4		1	-12.8		FL(FG)	Florida Bay, Schooner Bank	1983	bay	Harrigan et al. 1989
Plant	Hydrocharitaceae	Seagrass	Turtle grass	Thalassia testudinum	Photosynthesis	1	3.7		1	-13.6		FL(FG)	Florida Bay, Schooner Bank	1983	bay	Harrigan et al. 1989
Plant	Cymodoceaceae	Seagrass	Shoal grass	Halodule wrightii	Photosynthesis				2	-14.45		FL(FG)	Apalachicola Bay	1992	bay	Chanton and Lewis 2002
Plant	Cymodoceaceae	Seagrass	Shoal grass	Halodule wrightii	Photosynthesis	3	2.7	0.87178	3	-12.1	0.34641	FL(FG)	Florida Bay, Rankin Basin & Rabbit Key	1998	bay	Chasar et al. 2005
Plant	Cymodoceaceae	Seagrass	Shoal grass	Halodule spp	Photosynthesis	1	2.92		1	-12.26		NC	Core sound	2007	shelf	Deehr et al. 2014
Plant	Cymodoceaceae	Seagrass	Shoal grass	Halodule wrightii	Photosynthesis	60	4.4	0.6				TX	Laguna Madre, Sputh Bay Coastal Preserve	2014	bay	Delgado et al. 2017
Plant	Cymodoceaceae	Seagrass	Manatee grass	Syringodium filiforme	Photosynthesis	3	4.64	0.09	3	-5.25	0.19	TX	Port Isabel	2007	bay	Gorga 2010
Plant	Cymodoceaceae	Seagrass	Manatee grass	Syringodium filiforme	Photosynthesis	3	6.32	0.23	3	-10.82	0.14	TX	Port Aransas	2007	bay	Gorga 2010
Plant	Cymodoceaceae	Seagrass	Shoal grass	Halodule wrightii	Photosynthesis	3	5.39	0.11	3	-9.79	0.26	TX	Port Isabel	2007	bay	Gorga 2010
Plant	Cymodoceaceae	Seagrass	Shoal grass	Halodule wrightii	Photosynthesis	3	7.2	0.18	3	-5.2	0.08	TX	Port Aransas	2007	bay	Gorga 2010
Plant	Cymodoceaceae	Seagrass	Shoal grass	Halodule wrightii	Photosynthesis	1	3.67624		1	-9.40826		TX	North Pass, Aransas Bay	1999	bay	Herzka et al. 2002
Plant	Cymodoceaceae	Seagrass	Shoal grass	Halodule wrightii	Photosynthesis	16	5.46875	0.369274	16	-12.425	0.49635	TX	Mission-Aransas estuary, stations 3-5	2010	estuary	Lebreton et al. 2016
Plant	Cymodoceaceae	Seagrass	Shoal grass	Halodule wrightii	Photosynthesis	4	6	1.1	4	-12.2	1.2	MS	Mississippi Sound, Horn Island seagrass beds	1991	shelf	Moncreiff and Sullivan 2001
Plant	Cymodoceaceae	Seagrass	Shoal grass	Halodule wrightii	Photosynthesis	4	3.5	1.24	4	-11.74	0.4	TX	Lavaca Bay	2006	bay	Oakley et al. 2014
Plant	Cymodoceaceae	Seagrass	Manatee grass	Syringodium filiforme	Photosynthesis	3	0.3	1	3	-8.8	0.4	FL(FG)	Tampa Bay to Florida Bay, exact location not identified	2004	bay	Reich et al. 2008
Plant	Cymodoceaceae	Seagrass	Shoal grass	Halodule wrightii	Photosynthesis	6	-0.8	1	6	-10.8	0.2	FL(FG)	Tampa Bay to Florida Bay, exact location not identified	2004	bay	Reich et al. 2008
Plant	Cymodoceaceae	Seagrass	Shoal grass	Halodule wrightii	Photosynthesis	5	6.58	0.1	5	-11.92	0.2	TX	Nueces Bay	2014	salt marsh	Rezek et al. 2017
Plant	Cymodoceaceae	Seagrass	Manatee grass	Syringodium filiforme	Photosynthesis	2	4.1		2	-6.9		FL(FG)	St. Joseph's Bay	2011	bay	Williams et al. 2014
Plant	Cymodoceaceae	Seagrass	Shoal grass	Halodule wrightii	Photosynthesis	2	1.4		2	-11.4		FL(FG)	St. Joseph's Bay	2011	bay	Williams et al. 2014
Plant	Cymodoceaceae	Seagrass	Shoal grass	Halodule and Syringodium spp	Photosynthesis	11	2	0.6	11	-8.8	1.6	FL(FG)	Florida Big Bend, St. George Sound	2007	bay	Wilson et al. 2017
Plant	Hydrocharitaceae	Seagrass	Turtle grass	Thalassia testudinum	Photosynthesis	10	-0.066	1.07808	10	-15.016	2.26921	FL(FG)	West Florida Shelf, Weeki Wachee to Waccasassa	2010	shelf	Barry et al. 2017
Plant	Hydrocharitaceae	Seagrass	Turtle grass	Thalassia testudinum	Photosynthesis	6	2.96667	0.465475	6	-6.96667	0.525991	FL(FG)	Florida Bay, FL Keys	1997	neritic	Behringer and Butler 2006
Plant	Hydrocharitaceae	Seagrass	Turtle grass	Thalassia testudinum	Photosynthesis	13	3.56923	1.41503	13	-10.1615	1.25468	FL(FG)	Florida Bay	1997	bay	Chasar et al. 2005
Plant	Hydrocharitaceae	Seagrass	Turtle grass	Thalassia testudinum	Photosynthesis	69	5.77058	2.27882				FL(FG)	Florida Bay	1994	bay	Corbett et al. 1999
Plant	Hydrocharitaceae	Seagrass	Turtle grass	Thalassia testudinum	Photosynthesis	10	4.1	2.5	10	-10.6	1.1	FL(FG)	Florida Bay	2012	bay	Denton et al. 2019
Plant	Hydrocharitaceae	Seagrass	Turtle grass	Thalassia testudinum	Photosynthesis	10	6	0.948683	10	-10.7	0.632456	FL(FG)	Florida Bay, Sunset Cove and Rabbit Key Bason	2001	bay	Fourqurean and Schrlau 2003
Plant	Hydrocharitaceae	Seagrass	Turtle grass	Thalassia testudinum	Photosynthesis	3	5.26	0.05	3	-9.34	0.03	TX	Port Isabel	2007	bay	Gorga 2010
Plant	Hydrocharitaceae	Seagrass	Turtle grass	Thalassia testudinum	Photosynthesis	3	5.59	0.11	3	-12.03	0.16	TX	Port Aransas	2007	bay	Gorga 2010
Plant	Hydrocharitaceae	Seagrass	Seagrass	Thalassia testudinum, Cymodocea filiformis, Halodule beaudettei	Photosynthesis	3	5.08468	0.404145	3	-8.12409	2.49245	TX	lower Texas Coast, North Padre Island to Mexico border	2007	shelf	Howell et al. 2016
Plant	Hydrocharitaceae	Seagrass	Seagrass	Thalassia testudinum, Cymodocea filiformis, Halodule beaudettei	Photosynthesis	3	6.3657	0.80678	3	-9.35556	3.64035	TX	middle Texas Coast, Colorado River through Mustang Island	2007	shelf	Howell et al. 2016
Plant	Hydrocharitaceae	Seagrass	Turtle grass	Thalassia testudinum	Photosynthesis	6	4.28546	0.560933	6	-10.4637	0.732397	FL(FG)	Saint Joseph's Bay	2010	bay	Marco-Mendez et al. 2012
Plant	Hydrocharitaceae	Seagrass	Turtle grass	Thalassia testudinum	Photosynthesis	16	4.77	1.48	16	-10.21	0.52	FL(FG)	Big Lagoon, FL and Fort Morgan, AL	2009	bay	Prado et al. 2012
Plant	Hydrocharitaceae	Seagrass	Turtle grass	Thalassia testudinum	Photosynthesis	3	1.4	1.2	3	-9.6	1.2	FL(FG)	Tampa Bay to Florida Bay, exact location not identified	2004	bay	Reich et al. 2008
Plant	Hydrocharitaceae	Seagrass	Star grass	Halophila engelmanni	Photosynthesis	5	7.02	0.574456	5	-13.96	1.79165	TX	Nueces Bay	2014	salt marsh	Rezek et al. 2017
Plant	Hydrocharitaceae	Seagrass	Turtle grass	Thalassia testudinum	Photosynthesis	2	5.6	0.0141421	2	-7.7	0.141421	FL(FG)	St. Joseph's Bay	2011	bay	Vander Zanden et al. 2013
Plant	Hydrocharitaceae	Seagrass	Turtle grass	Thalassia testudinum	Photosynthesis				8	-8.525	0.158114	FL(FG)	Florida Bay	2007	bay	Williams et al. 2009
Plant	Hydrocharitaceae	Seagrass	Turtle grass	Thalassia testudinum	Photosynthesis	2	5.6		2	-6.8		FL(FG)	St. Joseph's Bay	2011	bay	Williams et al. 2014
Plant	Multiple	Seagrass	Shoal grass, Manatee grass, Turtle grass	Halodule wrightii, Syringodium filiforme, Thalassia testudinum	Photosynthesis	15	1.1	2.32379	15	-12.9	1.93649	FL(FG)	Ten Thousand Islands	2001	estuary	Alves-Stanley et al. 2010
Plant	Multiple	Seagrass	Shoal grass, Manatee grass, Turtle grass	Halodule wrightii, Syringodium filiforme, Thalassia testudinum	Photosynthesis	15	1.4	1.1619	15	-11	1.93649	FL(FG)	Charlotte Harbor	2001	estuary	Alves-Stanley et al. 2010
Plant	Multiple	Seagrass	Shoal grass, Manatee grass, Turtle grass	Halodule wrightii, Syringodium filiforme, Thalassia testudinum	Photosynthesis	16	2.5	1.6	16	-14.8	3.2	FL(FG)	Tampa Bay	2001	estuary	Alves-Stanley et al. 2010
Plant	Multiple	Seagrass	Shoal grass, Manatee grass, Turtle grass	Halodule wrightii, Syringodium filiforme, Thalassia testudinum	Photosynthesis	164	2.19441	0.645854				FL(FG)	Sarasota Bay	1999	bay	Dillon and Chanton 2008
Plant	Multiple	Seagrass	Seagrass	Unidentified	Photosynthesis	5	6.02202	1.00209	5	-12.2268	1.10309	AL	AL coast	2011	shelf	Kroetz et al. 2017
Plant	Zosteraceae	Seagrass	Common eelgrass	Zostera marina	Photosynthesis				1	-10		NC	Cape Lookout Bight	1988	bay	Canuel et al. 19997
Plant	Zosteraceae	Seagrass	Common eelgrass	Zostera marina	Photosynthesis	8	6.09148	0.50111	8	-10.0085	0.893274	VA	Goodwin Island	2005	bay	Douglass et al. 2011
Plant	Zosteraceae	Seagrass	Common eelgrass	Zostera marina	Photosynthesis	22	6.55	0.68	22	-10.07	0.43	VA	Virginia Coast Reserve LTER site	2010	bay	Hondula and Price 2014
Plant	Zosteraceae	Seagrass	Common eelgrass	Zostera marina	Photosynthesis	4	6.79	0.34	4	-9.37	0.55	VA	Wreck Island	2014	bay	Oreska et al. 2018
Plant	Zosteraceae	Seagrass	Common eelgrass	Zostera marina	Photosynthesis				12	-10.2	0.75	NC	Phillips Island, Newport River estuary	1975	estuary	Thayer et al. 1978
Arthropoda	Multiple	Shrimp	Shrimp	Unidentified	Omnivore	5	10.872	0.56785	5	-19.5155	0.979381	AL	AL coast	2011	shelf	Kroetz et al. 2017
Arthropoda	Penaeidae	Shrimp	Northern brown shrimp	Farfantepenaeus aztecus	Omnivore	3	8.3	0.173205	3	-17.1	0.173205	FL(FG)	Cedar Key	2008	salt marsh	Baker et al. 2013
Arthropoda	Penaeidae	Shrimp	Northern brown shrimp	Farfantepenaeus aztecus	Omnivore	3	9.6	0.173205	3	-16.9	0.34641	LA	Timbalier Bay	2008	salt marsh	Baker et al. 2013
Arthropoda	Penaeidae	Shrimp	Northern brown shrimp	Farfantepenaeus aztecus	Omnivore	3	10.4	0.519615	3	-19.1	0.34641	LA	Barataria Bay	2008	salt marsh	Baker et al. 2013
Arthropoda	Penaeidae	Shrimp	Northern white shrimp	Litopenaeus setiferus	Omnivore	3	9.4	0.173205	3	-16.9	0.34641	LA	Timbalier Bay	2008	salt marsh	Baker et al. 2013
Arthropoda	Penaeidae	Shrimp	Northern brown shrimp	Farfantepenaeus aztecus	Omnivore	3	7.3	0.173205	3	-14.8	0.173205	NC	Wrightsville Beach	2008	salt marsh	Baker et al. 2013
Arthropoda	Penaeidae	Shrimp	Northern brown shrimp	Farfantepenaeus aztecus	Omnivore	3	7.7	0.69282	3	-15.6	0.519615	NC	Pamilico Sound	2008	salt marsh	Baker et al. 2013
Arthropoda	Penaeidae	Shrimp	Northern brown shrimp	Farfantepenaeus aztecus	Omnivore	3	8.2	0.34641	3	-16.5	0.519615	NC	Newport River	2008	salt marsh	Baker et al. 2013
Arthropoda	Penaeidae	Shrimp	Northern brown shrimp	Farfantepenaeus aztecus	Omnivore	3	7.6	0.34641	3	-15.3	0.519615	TX	Aransas Bay	2008	salt marsh	Baker et al. 2013
Arthropoda	Penaeidae	Shrimp	Northern brown shrimp	Farfantepenaeus aztecus	Omnivore	3	9	0.34641	3	-18.3	0.173205	TX	Sabine Lake	2008	salt marsh	Baker et al. 2013
Arthropoda	Penaeidae	Shrimp	Northern brown shrimp	Farfantepenaeus aztecus	Omnivore	3	9.2	0.34641	3	-17.2	0.519615	TX	Galveston Bay	2008	salt marsh	Baker et al. 2013
Arthropoda	Penaeidae	Shrimp	Northern white shrimp	Litopenaeus setiferus	Omnivore	1	6.9		1	-15.4		TX	Aransas Bay	2008	salt marsh	Baker et al. 2013
Arthropoda	Penaeidae	Shrimp	Northern white shrimp	Litopenaeus setiferus	Omnivore	1	8.3		1	-17.1		TX	Sabine Lake	2008	salt marsh	Baker et al. 2013
Arthropoda	Penaeidae	Shrimp	Northern white shrimp	Litopenaeus setiferus	Omnivore	3	8.8	0.173205	3	-17	0.519615	TX	Galveston Bay	2008	salt marsh	Baker et al. 2013
Arthropoda	Penaeidae	Shrimp	Northern brown shrimp	Farfantepenaeus aztecus	Omnivore	3	10.9	0.34641	3	-16.3	0.173205	VA	Chesapeake	2008	salt marsh	Baker et al. 2013
Arthropoda	Penaeidae	Shrimp	Northern white shrimp	Litopenaeus setiferus	Omnivore				19	-20		FL(FG)	Apalachicola Bay, Cat point & Dry bar	1992	bay	Chanton and Lewis 2002
Arthropoda	Penaeidae	Shrimp	Northern brown shrimp	Farfantepenaeus aztecus	Omnivore	11	8.65	0.663325	11	-17.3		NC	Core sound	2007	shelf	Deehr et al. 2014
Arthropoda	Penaeidae	Shrimp	Shrimp	Penaeus spp	Omnivore	4	10.87	0.56	4	-19.47	0.75	AL	shelf	2008	shelf	Drymon et al. 2012
Arthropoda	Penaeidae	Shrimp	Northern brown shrimp	Farfantepenaeus aztecus	Omnivore	19	10.1	0.305123	19	-19.5	0.392301	LA	Terrebonne Bay	2000	bay	Duque 2004
Arthropoda	Penaeidae	Shrimp	Northern brown shrimp	Farfantepenaeus aztecus	Omnivore	310	9.3	1.76068	310	-19.4	1.76068	LA	Terrebonne Bay	2005	bay	Fry 2011
Arthropoda	Penaeidae	Shrimp	Northern brown shrimp	Farfantepenaeus aztecus	Omnivore	175	9.868	0.971799	175	-17.144	2.21506	LA	Barataria Bay	2005	bay	Fry 2011
Arthropoda	Penaeidae	Shrimp	Northern brown shrimp	Farfantepenaeus aztecus	Omnivore	71	9.93944	0.598791	71	-17.1803	1.5837	LA	Barataria Bay	1999	bay	Fry 2011
Arthropoda	Penaeidae	Shrimp	Northern brown shrimp	Farfantepenaeus aztecus	Omnivore	71	12.2014	0.447214	71	-18.8549	0.928388	LA	western Delta	2006	bay	Fry 2011
Arthropoda	Penaeidae	Shrimp	Northern brown shrimp	Farfantepenaeus aztecus	Omnivore	74	12.8351	0.681798	74	-20.5243	0.972968	LA	central and eastern Delta	2006	bay	Fry 2011
Arthropoda	Penaeidae	Shrimp	Northern brown shrimp	Farfantepenaeus aztecus	Omnivore	45	8.82	0.62	45	-15.96	1.01	TX	Galveston Bay	1995	bay	Fry 2011
Arthropoda	Penaeidae	Shrimp	Northern brown shrimp	Farfantepenaeus aztecus	Omnivore	18	13.9	0.848528	18	-19.5	1.69706	TX	Upper Galveston Bay	1995	bay	Fry 2011
Arthropoda	Penaeidae	Shrimp	Pink shrimp	Farfantepenaeus duorarum	Omnivore	177	6.96	0.950295	177	-21.75	2.57937	FL(FG)	Mangrove Bay Sites, lower Ten Thousand Islands	1997	bay	Fry et al. 1999
Arthropoda	Penaeidae	Shrimp	Pink shrimp	Farfantepenaeus duorarum	Omnivore	96	5.38	1.04978	96	-12.11	1.49969	FL(FG)	Florida Bay, Seagrass Sites	1997	bay	Fry et al. 1999
Arthropoda	Penaeidae	Shrimp	Pink shrimp	Farfantepenaeus duorarum	Omnivore	74	6.56	0.79	74	-14.67	1.8	FL(FG)	Florida Bay, Tortugas	1997	bay	Fry et al. 1999
Arthropoda	Penaeidae	Shrimp	Pink shrimp	Farfantepenaeus duorarum	Omnivore	60	6.58	0.87	60	-14.67	1.07	FL(FG)	Florida Bay, Sanibel	1997	bay	Fry et al. 1999
Arthropoda	Penaeidae	Shrimp	Northern brown shrimp	Farfantepenaeus aztecus	Omnivore	49	10.151	0.583177	49	-20.1816	1.45955	LA	Terrebonne Bay	2000	bay	Fry et al. 2003
Arthropoda	Penaeidae	Shrimp	Pink shrimp	Farfantepenaeus duorarum	Omnivore	4	6.65	0.4	4	-23.2	0.25	FL(FG)	Whitewater Bay, South Florida	1983	bay	Harrigan et al. 1989
Arthropoda	Penaeidae	Shrimp	Pink shrimp	Farfantepenaeus duorarum	Omnivore	4	5.4	0.5	4	-13.7	0.93	FL(FG)	Florida Bay, Schooner Bank	1983	bay	Harrigan et al. 1989
Arthropoda	Penaeidae	Shrimp	Northern brown shrimp	Farfantepenaeus aztecus	Omnivore	40	11		40	-17.7		MS	Mississippi Sound, Horn Island seagrass beds	1991	shelf	Moncreiff and Sullivan 2001
Arthropoda	Penaeidae	Shrimp	Northern white shrimp	Litopenaeus setiferus	Omnivore	3	11.4		3	-19.6		MS	Mississippi Sound, Horn Island seagrass beds	1991	shelf	Moncreiff and Sullivan 2001
Arthropoda	Penaeidae	Shrimp	Pink shrimp	Farfantepenaeus duorarum	Omnivore	8	11.2		8	-16.5		MS	Mississippi Sound, Horn Island seagrass beds	1991	shelf	Moncreiff and Sullivan 2001
Arthropoda	Penaeidae	Shrimp	Roughneck shrimp	Rimapenaeus constrictus	Omnivore	29	11.4		29	-16.7		MS	Mississippi Sound, Horn Island seagrass beds	1991	shelf	Moncreiff and Sullivan 2001
Arthropoda	Penaeidae	Shrimp	Yellow roughneck shrimp	Rimapenaeus similis	Omnivore	97	11.8		97	-17.9		MS	Mississippi Sound, Horn Island seagrass beds	1991	shelf	Moncreiff and Sullivan 2001
Arthropoda	Penaeidae	Shrimp	Shrimp	Penaeus spp	Omnivore				5	-16.8	0.8	FL(FG)	Florida Big Bend, St. Joseph's Bay to Cedar Key	2007	shelf	Nelson et al. 2012
Arthropoda	Penaeidae	Shrimp	Northern brown shrimp	Farfantepenaeus aztecus	Omnivore	16	8.65	1.48	16	-16.56	2.4	TX	Lavaca Bay	2006	bay	Oakley et al. 2014
Arthropoda	Penaeidae	Shrimp	Northern white shrimp	Litopenaeus setiferus	Omnivore	10	9.93	1.58114	10	-17.45	2.56144	TX	Lavaca Bay	2006	bay	Oakley et al. 2014
Arthropoda	Penaeidae	Shrimp	Penaeid shrimp	Farfantepenaeus spp	Omnivore	10	9.99	1.61276	10	-17.39	1.86574	TX	Lavaca Bay	2006	bay	Oakley et al. 2014
Arthropoda	Penaeidae	Shrimp	Shrimp	Penaeus spp	Omnivore	3	9.84	1.55885	3	-17.1	0.831384	TX	Lavaca Bay	2006	bay	Oakley et al. 2014
Arthropoda	Penaeidae	Shrimp	Northern brown shrimp	Farfantepenaeus aztecus	Omnivore	43	12.1558	1.23993	43	-16.5395	1.23184	TX	Nueces Bay	2014	salt marsh	Rezek et al. 2017
Arthropoda	Penaeidae	Shrimp	Northern brown shrimp	Farfantepenaeus aztecus	Omnivore				10	-20.5		MS	Graveline Bay Marsh	1988	salt marsh	Sullivan and Moncreiff 1990
Arthropoda	Penaeidae	Shrimp	Shrimp	Penaeus spp	Omnivore				10	-19.5	0.5	LA	Barataria Bay	2010	bay	Wilson et al. 2015
Arthropoda	Penaeidae	Shrimp	Northern brown shrimp	Farfantepenaeus aztecus	Omnivore	9	8	0.5	9	-18.4	0.5	TX	Mad Island Marsh Preserve	1999	salt marsh	Winemiller et al. 2007
Arthropoda	Penaeidae	Shrimp	Northern white shrimp	Litopenaeus setiferus	Omnivore	5	10.1	3.3	5	-20.6	3.3	TX	Mad Island Marsh Preserve	1999	salt marsh	Winemiller et al. 2007
Arthropoda	Squillidae	Shrimp	Mantis shrimp	Squilla empusa	Omnivore	22	12.8945	0.633539	22	-18.6627	0.700206	VA	Chesapeake Bay, spring & fall, 2006 & 2007	2006	bay	Buchheister and Latour 2011
Arthropoda	Squillidae	Shrimp	Mantis shrimp	Squilla empusa	Omnivore	3	12.5	0.8	3	-18.78	0.67	AL	shelf	2008	shelf	Drymon et al. 2012
Arthropoda	Squillidae	Shrimp	Mantis shrimp	Squilla empusa	Omnivore	23	13.1		23	-16.9		MS	Mississippi Sound, Horn Island seagrass beds	1991	shelf	Moncreiff and Sullivan 2001
References
Abeels, H., Loh, A., and Volety, A. (2012). Trophic transfer and habitat use of oyster Crassostrea virginica reefs in southwest Florida, identified by stable isotope analysis. Mar. Ecol. Prog. Ser. 462, 125–142. doi:10.3354/meps09824.
Alves-Stanley, C., Worthy, G., and Bonde, R. (2010). Feeding preferences of West Indian manatees in Florida, Belize, and Puerto Rico as indicated by stable isotope analysis. Mar. Ecol. Prog. Ser. 402, 255–267. doi:10.3354/meps08450.
Baker, R., Fry, B., Rozas, L., and Minello, T. (2013). Hydrodynamic regulation of salt marsh contributions to aquatic food webs. Mar. Ecol. Prog. Ser. 490, 37–52. doi:10.3354/meps10442.
Barry, S., Jacoby, C., and Frazer, T. (2017). Environmental influences on growth and morphology of Thalassia testudinum. Mar. Ecol. Prog. Ser. 570, 57–70. doi:10.3354/meps12112.
Beck, S., and La Peyre, M. K. (2015). Effects of oyster harvest activities on Louisiana reef habitat and resident nekton communities. FB 113, 327–340. doi:10.7755/FB.113.3.8.
Behringer, D. C., and Butler, M. J. (2006). Stable isotope analysis of production and trophic relationships in a tropical marine hard-bottom community. Oecologia 148, 334–341. doi:10.1007/s00442-006-0360-0.
Biancani, P. J., Carmichael, R. H., Daskin, J. H., Burkhardt, W., and Calci, K. R. (2012). Seasonal and spatial effects of wastewater effluent on growth, survival, and accumulation of microbial contaminants by oysters in Mobile Bay, Alabama. Estuaries and Coasts 35, 121–131. doi:10.1007/s12237-011-9421-7.
Bishop, K. A., McClelland, J. W., and Dunton, K. H. (2017). Freshwater contributions and nitrogen sources in a South Texas estuarine ecosystem: a time-integrated perspective from stable isotopic ratios in the Eastern oyster (Crassostrea virginica). Estuaries and Coasts 40, 1314–1324. doi:10.1007/s12237-017-0227-0.
Blomberg, B. N., Lebreton, B., Palmer, T. A., Guillou, G., Beseres Pollack, J., and Montagna, P. A. (2017). Does reef structure affect oyster food resources? A stable isotope assessment. Marine Environmental Research 127, 32–40. doi:10.1016/j.marenvres.2017.03.003.
Bucci, J. P., Rebach, S., DeMaster, D., and Showers, W. J. (2007a). A comparison of blue crab and bivalve δ15N tissue enrichment in two North Carolina estuaries. Environmental Pollution 145, 299–308. doi:10.1016/j.envpol.2006.03.009.
Bucci, J. P., Showers, W. J., Rebach, S., DeMaster, D., and Genna, B. (2007b). Stable isotope analyses (δ15N and δ13C) of the trophic relationships of Callinectes sapidus in two North Carolina estuaries. Estuaries and Coasts 30, 1049–1059. Available at: http://link.springer.com/article/10.1007/BF02841395 [Accessed July 9, 2014].
Buchheister, A., and Latour, R. J. (2011). Trophic ecology of summer flounder in lower Chesapeake Bay inferred from stomach content and stable isotope analyses. Transactions of the American Fisheries Society 140, 1240–1254. doi:10.1080/00028487.2011.618364.
Canuel, E. A., Freeman, K. H., and Wakeham, S. G. (1997). Isotopic compositions of lipid biomarker compounds in estuarine plants and surface sediments. Limnol. Oceanogr. 42, 1570–1583. doi:10.4319/lo.1997.42.7.1570.
Chanton, J., and Lewis, F. G. (2002). Examination of coupling between primary and secondary production in a river-dominated estuary: Apalachicola Bay, Florida, U.S.A. Limnol. Oceanogr. 47, 683–697. doi:10.4319/lo.2002.47.3.0683.
Chasar, L. C., Chanton, J. P., Koenig, C. C., and Coleman, F. C. (2005). Evaluating the effect of environmental disturbance on the trophic structure of Florida Bay, U.S.A.: Multiple stable isotope analyses of contemporary and historical specimens. Limnol. Oceanogr. 50, 1059–1072. doi:10.4319/lo.2005.50.4.1059.
Corbett, D. R., Chanton, J., Burnett, W., Dillon, K., Rutkowski, C., and Fourqurean, J. W. (1999). Patterns of groundwater discharge into Florida Bay. Limnol. Oceanogr. 44, 1045–1055. doi:10.4319/lo.1999.44.4.1045.
Currin, C., Newell, S., and Paerl, H. (1995). The role of standing dead Spartina alterniflora and benthic microalgae in salt marsh food webs: Considerations based on multiple stable isotope analysis. Mar. Ecol. Prog. Ser. 121, 99–116. doi:10.3354/meps121099.
Deehr, R. A., Luczkovich, J. J., Hart, K. J., Clough, L. M., Johnson, B. J., and Johnson, J. C. (2014). Using stable isotope analysis to validate effective trophic levels from Ecopath models of areas closed and open to shrimp trawling in Core Sound, NC, USA. Ecological Modelling 282, 1–17. doi:10.1016/j.ecolmodel.2014.03.005.
Delgado, M., Cintra-Buenrostro, C. E., and Fierro-Cabo, A. (2017). Decomposition and nitrogen dynamics of turtle grass (Thalassia testudinum) in a subtropical estuarine system. Wetlands Ecol Manage 25, 667–681. doi:10.1007/s11273-017-9543-1.
Denton, M. J., Demopoulos, A. W. J., Baldwin, J. D., Smith, B. J., and Hart, K. M. (2019). Stable isotope analysis enhances our understanding of diamondback terrapin (Malaclemys terrapin) foraging ecology. Estuaries and Coasts 42, 596–611. doi:10.1007/s12237-018-0476-6.
Dillon, K., Peterson, M., and May, C. (2015). Functional equivalence of constructed and natural intertidal eastern oyster reef habitats in a northern Gulf of Mexico estuary. Mar. Ecol. Prog. Ser. 528, 187–203. doi:10.3354/meps11269.
Dillon, K. S., and Chanton, J. P. (2008). Nitrogen stable isotopes of macrophytes assess stormwater nitrogen inputs to an urbanized estuary. Estuaries and Coasts: J CERF 31, 360–370. doi:10.1007/s12237-007-9028-1.
Douglass, J. G., Emmett Duffy, J., and Canuel, E. A. (2011). Food web structure in a chesapeake bay eelgrass bed as determined through gut contents and 13C and 15N isotope analysis. Estuaries and Coasts 34, 701–711. doi:10.1007/s12237-010-9356-4.
Drymon, J. M., Powers, S. P., and Carmichael, R. H. (2012). Trophic plasticity in the Atlantic sharpnose shark (Rhizoprionodon terraenovae) from the north central Gulf of Mexico. Environ Biol Fish 95, 21–35. doi:10.1007/s10641-011-9922-z.
Duque, G. (2004). Influence of the marsh edge on the structure and trophic ecology of the fish and macroinvertebrate community in a Louisiana estuarine ecosystem. Ph.D. Dissertation. Louisiana State University.
Fertig, B., Carruthers, T. J. B., Dennison, W. C., Meyer, K. A., and Williams, M. R. (2014). Isotopic values in oysters indicate elemental sources constrained by multiple gradients. Ecological Indicators 46, 101–109. doi:10.1016/j.ecolind.2014.06.004.
Fourqurean, J. W., and Schrlau, J. E. (2003). Changes in nutrient content and stable isotope ratios of C and N during decomposition of seagrasses and mangrove leaves along a nutrient availability gradient in Florida Bay, USA. Chemistry and Ecology 19, 373–390. doi:10.1080/02757540310001609370.
Fry, B. (2008). Open bays as nurseries for Louisiana brown shrimp. Estuaries and Coasts 31, 776–789. doi:10.1007/s12237-008-9067-2.
Fry, B. (2011). Mississippi River sustenance of brown shrimp (Farfantepenaeus aztecus) in Louisiana coastal waters. Fishery Bulletin 109, 147–161.
Fry, B., and Anderson, L. C. (2014). Minimal incorporation of Deepwater Horizon oil by estuarine filter feeders. Marine Pollution Bulletin 80, 282–287. doi:10.1016/j.marpolbul.2013.10.018.
Fry, B., Baltz, D. M., Benfield, M. C., Fleeger, J. W., Gace, A., Haas, H. L., et al. (2003). Stable isotope indicators of movement and residency for brown shrimp (Farfantepenaeus aztecus) in coastal Louisiana marshscapes. Estuaries 26, 82–97. doi:10.1007/BF02691696.
Fry, B., and Chumchal, M. M. (2012). Mercury bioaccumulation in estuarine food webs. Ecological Applications 22, 606–623. doi:10.1890/11-0921.1.
Fry, B., Mumford, P. L., and Robblee, M. B. (1999). Stable isotope studies of pink shrimp (Farfantepenaeus duorarum burkenroad) migrations on the southwestern Florida shelf. BULLETIN OF MARINE SCIENCE 65, 12.
Gelpi, C., Fry, B., Condrey, R., Fleeger, J., and Dubois, S. (2013). Using δ13C and δ15N to determine the migratory history of offshore Louisiana blue crab spawning stocks. Marine Ecology Progress Series 494, 205–218. doi:10.3354/meps10540.
Gorga, C. C. T. (2010). Foraging ecology of green turtles (Chelonia mydas) on the Texas Coast, as determined by stable isotope analysis. M.S. Thesis. Texas A&M University.
Harrigan, P., Zieman, J. C., and Macko, A. (1989). The base of nutritional support for the gray snapper (Lutjanus griseus): An evaluation based on a combined stomach content and stable isotope analysis. Bulletin of Marine Science 44, 65–77.
Herzka, S., Holt, S., and Holt, G. (2002). Characterization of settlement patterns of red drum Sciaenops ocellatus larvae to estuarine nursery habitat: a stable isotope approach. Mar. Ecol. Prog. Ser. 226, 143–156. doi:10.3354/meps226143.
Hoeinghaus, D., and Davis SE, I. (2007). Size-based trophic shifts of saltmarsh dwelling blue crabs elucidated by dual stable C and N isotope analyses. Mar. Ecol. Prog. Ser. 334, 199–204. doi:10.3354/meps334199.
Hondula, K., and Pace, M. (2014). Macroalgal support of cultured hard clams in a low nitrogen coastal lagoon. Mar. Ecol. Prog. Ser. 498, 187–201. doi:10.3354/meps10644.
Howell, L., Reich, K., Shaver, D., Landry Jr, A., and Gorga, C. (2016). Ontogenetic shifts in diet and habitat of juvenile green sea turtles in the northwestern Gulf of Mexico. Marine Ecology Progress Series 559, 217–229. doi:10.3354/meps11897.
Knoff, A. J., Macko, S. A., and Erwin, R. M. (2001). Diets of nesting laughing gulls (Larus atricilla) at the Virginia Coast Reserve: observations from stable isotope analysis. Isotopes Environ Health Stud 37, 67–88. doi:10.1080/10256010108033282.
Kroetz, A. M., Drymon, J. M., and Powers, S. P. (2017). Comparative dietary diversity and trophic ecology of two estuarine mesopredators. Estuaries and Coasts 40, 1171–1182. doi:10.1007/s12237-016-0188-8.
Lebreton, B., Beseres Pollack, J., Blomberg, B., Palmer, T. A., Adams, L., Guillou, G., et al. (2016). Origin, composition and quality of suspended particulate organic matter in relation to freshwater inflow in a South Texas estuary. Estuarine, Coastal and Shelf Science 170, 70–82. doi:10.1016/j.ecss.2015.12.024.
Loh, A. N., Hermabessière, L., Goodman, P., Volety, A. K., and Soudant, P. (2017). Impacts of altered hydrology on the sources of particulate organic carbon on the diet of Crassostrea virginica in the northern Everglades, Florida, USA. Journal of Shellfish Research 36, 707–715.
Marco-Méndez, C., Prado, P., Heck, K., Cebrián, J., and Sánchez-Lizaso, J. (2012). Epiphytes mediate the trophic role of sea urchins in Thalassia testudinum seagrass beds. Mar. Ecol. Prog. Ser. 460, 91–100. doi:10.3354/meps09781.
Milbrandt, E. C., Reidenbach, L., and Parsons, M. (2019). Determining the sources of macroalgae during beach stranding events from species composition, stable isotope analysis, and laboratory experiments. Estuaries and Coasts 42, 719–730. doi:10.1007/s12237-018-00489-8.
Moncreiff, C., and Sullivan, M. (2001). Trophic importance of epiphytic algae in subtropical seagrass beds: evidence from multiple stable isotope analyses. Mar. Ecol. Prog. Ser. 215, 93–106. doi:10.3354/meps215093.
Nelson, J., Wilson, R., Coleman, F., Koenig, C., DeVries, D., Gardner, C., et al. (2012). Flux by fin: fish-mediated carbon and nutrient flux in the northeastern Gulf of Mexico. Mar Biol 159, 365–372. doi:10.1007/s00227-011-1814-4.
Oakley, J. W., Simons, J., and Stunz, G. W. (2014). Spatial and habitat-mediated food web dynamics in an oyster-dominated estuary. Journal of Shellfish Research 33, 841–855. doi:10.2983/035.033.0319.
Oczkowski, A. J., Lewis, F. G., Nixon, S. W., Edmiston, H. L., Robinson, R. S., and Chanton, J. P. (2011). Fresh water inflow and oyster productivity in Apalachicola Bay, FL (USA). Estuaries and Coasts 34, 993–1005. doi:10.1007/s12237-011-9383-9.
Olin, J. A., Bergeon Burns, C. M., Woltmann, S., Taylor, S. S., Stouffer, P. C., Bam, W., et al. (2017). Seaside Sparrows reveal contrasting food web responses to large-scale stressors in coastal Louisiana saltmarshes. Ecosphere 8, e01878. doi:10.1002/ecs2.1878.
Olin, J. A., Rush, S. A., MacNeil, M. A., and Fisk, A. T. (2012). Isotopic ratios reveal mixed seasonal variation among fishes from two subtropical estuarine systems. Estuaries and Coasts 35, 811–820. doi:10.1007/s12237-011-9467-6.
Olin, J., Hussey, N., Rush, S., Poulakis, G., Simpfendorfer, C., Heupel, M., et al. (2013). Seasonal variability in stable isotopes of estuarine consumers under different freshwater flow regimes. Mar. Ecol. Prog. Ser. 487, 55–69. doi:10.3354/meps10402.
Olsen, Z., Fulford, R., Dillon, K., and Graham, W. (2014). Trophic role of gulf menhaden Brevoortia patronus examined with carbon and nitrogen stable isotope analysis. Mar. Ecol. Prog. Ser. 497, 215–227. doi:10.3354/meps10519.
Oreska, M. P. J., Wilkinson, G. M., McGlathery, K. J., Bost, M., and McKee, B. A. (2018). Non-seagrass carbon contributions to seagrass sediment blue carbon: Non-seagrass blue carbon. Limnol. Oceanogr. 63, S3–S18. doi:10.1002/lno.10718.
Prado, P., Carmichael, R., Watts, S., Cebrian, J., and Heck, K. (2012). Diet-dependent δ13C and δ15N fractionation among sea urchin Lytechinus variegatus tissues: implications for food web models. Mar. Ecol. Prog. Ser. 462, 175–190. doi:10.3354/meps09786.
Pruell, R. J., Taplin, B. K., and Cicchelli, K. (2003). Stable isotope ratios in archived striped bass scales suggest changes in trophic structure. Fisheries Management and Ecology 10, 329–336. doi:10.1046/j.1365-2400.2003.00369.x.
Radabaugh, K. R., Hollander, D. J., and Peebles, E. B. (2013). Seasonal δ13C and δ15N isoscapes of fish populations along a continental shelf trophic gradient. Continental Shelf Research 68, 112–122. doi:10.1016/j.csr.2013.08.010.
Radabaugh, K. R., and Peebles, E. B. (2014). Multiple regression models of δ13C and δ15N for fish populations in the eastern Gulf of Mexico. Continental Shelf Research 84, 158–168. doi:10.1016/j.csr.2014.05.002.
Raven, J. A., and Osmond, C. B. (1992). Inorganic C acquisition processes and their ecological significance in inter- and sub-tidal macroalgae of North Carolina. Functional Ecology 6, 41. doi:10.2307/2389769.
Reeves, D. B., Chesney, E. J., Munnelly, R. T., Baltz, D. M., and Maiti, K. (2019). Trophic ecology of sheepshead and stone crabs at oil and gas platforms in the northern Gulf of Mexico’s hypoxic zone. Trans Am Fish Soc 148, 324–338. doi:10.1002/tafs.10135.
Reich, K. J., Bjorndal, K. A., and Martínez del Rio, C. (2008). Effects of growth and tissue type on the kinetics of 13C and 15N incorporation in a rapidly growing ectotherm. Oecologia 155, 651–663. doi:10.1007/s00442-007-0949-y.
Reynolds, J. E., Wetzel, D., Barros, N. B., Wells, R. S., and Parkway, K. T. (2001). Understanding of bottlenose dolphin (Tursiops truncatus) feeding ecology and trophic relationships.
Rezek, R. J., Lebreton, B., Sterba-Boatwright, B., and Beseres Pollack, J. (2017). Ecological structure and function in a restored versus natural salt marsh. PLoS ONE 12, e0189871. doi:10.1371/journal.pone.0189871.
Rossman, S., Berens McCabe, E., Barros, N. B., Gandhi, H., Ostrom, P. H., Stricker, C. A., et al. (2015). Foraging habits in a generalist predator: Sex and age influence habitat selection and resource use among bottlenose dolphins (Tursiops truncatus). Mar Mam Sci 31, 155–168. doi:10.1111/mms.12143.
Rush, S. A., Olin, J. A., Fisk, A. T., Woodrey, M. S., and Cooper, R. J. (2010). Trophic relationships of a marsh bird differ between Gulf coast estuaries. Estuaries and Coasts 33, 963–970. doi:10.1007/s12237-010-9281-6.
Senn, D. B., Chesney, E. J., Blum, J. D., Bank, M. S., Maage, A., and Shine, J. P. (2010). Stable isotope (N, C, Hg) study of methylmercury sources and trophic transfer in the northern Gulf of Mexico. Environ. Sci. Technol. 44, 1630–1637. doi:10.1021/es902361j.
Simonsen, K. A. (2008). The effect of an inshore artificial reef on the community structure and feeding ecology of estuarine fishes in Barataria Bay, Louisiana. M.S. Thesis. Louisiana State University.
Simonsen, K. A., and Cowan, J. H. (2013). Effects of an inshore artificial reef on the trophic dynamics of three species of estuarine fish. BMS 89, 657–676. doi:10.5343/bms.2012.1013.
Snover, M. L., Hohn, A. A., Crowder, L. B., and Macko, S. A. (2010). Combining stable isotopes and skeletal growth marks to detect habitat shifts in juvenile loggerhead sea turtles Caretta caretta. Endangered Species Research 13, 25–31. doi:10.3354/esr00311.
Street, G., Montagna, P., and Parker, P. (1997). Incorporation of brown tide into an estuarine food web. Mar. Ecol. Prog. Ser. 152, 67–78. doi:10.3354/meps152067.
Sulak, K. J., Berg, J. J., and Randall, M. (2012). Feeding habitats of the Gulf sturgeon, Acipenser oxyrinchus desotoi, in the Suwannee and Yellow rivers, Florida, as identified by multiple stable isotope analyses. Environ Biol Fish 95, 237–258. doi:10.1007/s10641-012-9986-4.
Sullivan, M., and Moncreiff, C. (1990). Edaphic algae are an important component of salt marsh food-webs: evidence from multiple stable isotope analyses. Mar. Ecol. Prog. Ser. 62, 149–159. doi:10.3354/meps062149.
Thayer, G. W., Parker, P. L., LaCroix, M. W., and Fry, B. (1978). The stable carbon isotope ratio of some components of an eelgrass, Zostera marina, bed. Oecologia 35, 1–12. doi:10.1007/BF00345537.
Thomas, C., and Cahoon, L. (1993). Stable isotope analyses differentiate between different trophic pathways supporting rocky-reef fishes. Mar. Ecol. Prog. Ser. 95, 19–24. doi:10.3354/meps095019.
Vander Zanden, H., Arthur, K., Bolten, A., Popp, B., Lagueux, C., Harrison, E., et al. (2013). Trophic ecology of a green turtle breeding population. Marine Ecology Progress Series 476, 237–249. doi:10.3354/meps10185.
Vedral, A. J. (2012). Blue crab residency and migration in the mobile bay estuary: a stable isotope study investigating connectivity. M.S. Thesis. University of Alabama.
Wallace, B. P., Avens, L., Braun-McNeill, J., and McClellan, C. M. (2009). The diet composition of immature loggerheads: Insights on trophic niche, growth rates, and fisheries interactions. Journal of Experimental Marine Biology and Ecology 373, 50–57. doi:10.1016/j.jembe.2009.03.006.
Williams, C. J., Jaffé, R., Anderson, W. T., and Jochem, F. J. (2009). Importance of seagrass as a carbon source for heterotrophic bacteria in a subtropical estuary (Florida Bay). Estuarine, Coastal and Shelf Science 85, 507–514. doi:10.1016/j.ecss.2009.09.019.
Williams, N. C., Bjorndal, K. A., Lamont, M. M., and Carthy, R. R. (2014). Winter diets of immature green turtles (Chelonia mydas) on a northern feeding ground: integrating stomach contents and stable isotope analyses. Estuaries and Coasts 37, 986–994. doi:10.1007/s12237-013-9741-x.
Wilson, R. M., Chanton, J., Lewis, G., and Nowacek, D. (2009). Isotopic variation (δ15N, δ13C, and δ34S) with body size in post-larval estuarine consumers. Estuarine, Coastal and Shelf Science 83, 307–312. doi:10.1016/j.ecss.2009.04.006.
Wilson, R. M., Cherrier, J., Sarkodee-Adoo, J., Bosman, S., Mickle, A., and Chanton, J. P. (2015). Tracing the intrusion of fossil carbon into coastal Louisiana macrofauna using natural 14C and 13C abundances. Deep Sea Research Part II: Topical Studies in Oceanography. doi:10.1016/j.dsr2.2015.05.014.
Wilson, R. M., Nelson, J. A., Balmer, B. C., Nowacek, D. P., and Chanton, J. P. (2013). Stable isotope variation in the northern Gulf of Mexico constrains bottlenose dolphin (Tursiops truncatus) foraging ranges. Mar Biol 160, 2967–2980. doi:10.1007/s00227-013-2287-4.
Wilson, R. M., Tyson, R. B., Nelson, J. A., Balmer, B. C., Chanton, J. P., and Nowacek, D. P. (2017). Niche differentiation and prey selectivity among common bottlenose dolphins (Tursiops truncatus) sighted in St. George Sound, Gulf of Mexico. Front. Mar. Sci. 4, 235. doi:10.3389/fmars.2017.00235.
Winemiller, K., Akin, S., and Zeug, S. (2007). Production sources and food web structure of a temperate tidal estuary: integration of dietary and stable isotope data. Mar. Ecol. Prog. Ser. 343, 63–76. doi:10.3354/meps06884.
Xu, X., Newman, M. C., Fabrizio, M. C., and Liang, L. (2013). An ecologically framed mercury survey of finfish of the lower Chesapeake Bay. Archives of Environmental Contamination and Toxicology 65, 510–520. doi:10.1007/s00244-013-9917-1.

## Sheet: Table S2
Source	State	Sample Type	Sample Size	Data Type	Turtle Carapace Length	% Crustacean	% Molluscs	% Fish	% Macroalgae/Seagrass	% Other/Unidentified
Schmid and Tucker 2018	FL(FG)	fecal	58	% dry matter	40.7 ± 8.5 cm SCL (24.2 - 63.7 cm)	80.6	0.3	0.1	0.1	18.9
Burke et al. 1993, 1994	NY	fecal	12	% dry matter	32.8 ± 4.8 cm SCL (24.7 - 42.6 cm)	80.4	4	0	9.9	5.7
Seney and Musick 2005	VA	whole digestive tract	18	% dry matter	36.7 ± 7.3 cm SCL (23.1 - 49.9 cm)	94.3	0.7	3	0.1	1.9
Servis et al. 2015	FL(FG)	stomach or entire GI contents	20	% wet volume	45.9 ± 3.1 cm SCL (23.6 - 65.0 cm)	70.7	5.2	8.7	0	15.4
Shaver 1991	TX	whole digestive tract	50	% dry matter	43.3 ± 2.2 cm CCL (5.2 - 71 cm)	95.4	1.56	0.08	0.14	2.82
Werner 1994	LA, TX	fecal	92	% dry matter	32.74 ± 7.14 cm SCL (21.6 - 59.5 cm)	61.57	8.66	13.65	4.35	11.77
Witzell and Schmid 2005*	FL(FG)	fecal	66	% dry matter	41.4 ± 5.8 cm SCL (28.2 - 52.5 cm)	34.9	2.6	0	0.1	62.4
*Excluded from analysis due to abnormally high Other/Unidentified percentage (i.e., high prevalence of tunicates in diet)
References
Burke, V. J., Morreale, S. J., and Standora, E. A. (1994). Diet of the Kemp’s ridley sea turtle, Lepidochelys kempii, in New York waters. Fishery Bulletin 92, 26–32.
Burke, V. J., Standora, E. A., and Morreale, S. J. (1993). Diet of juvenile Kemp’s ridley and loggerhead sea turtles from Long Island, New York. Copeia 1993, 1176–1180. doi:10.2307/1447107.
Schmid, J. R., and Tucker, A. D. (2018). Comparing diets of Kemp’s ridley sea turtles (Lepidochelys kempii ) in mangrove estuaries of Southwest Florida. Journal of Herpetology 52, 252–258. doi:10.1670/16-164.
Seney, E. E., and Musick, J. A. (2005). Diet analysis of Kemp’s ridley sea turtles (Lepidochelys kempii) in Virginia. Chelonian Conservation and Biology 4, 864–871.
Servis, J. A., Lovewell, G., and Tucker, A. D. (2015). Diet analysis of subadult Kemp’s ridley (Lepidochelys kempii) turtles from West-central Florida. Chelonian Conservation and Biology 14, 173–181.
Shaver, D. J. (1991). Feeding ecology of wild and head-started Kemp’s ridley sea turtles in South Texas waters. Journal of Herpetology 25, 327. doi:10.2307/1564592.
Werner, S. A. (1994). Feeding ecology of wild and head stared Kemp’s ridley sea turtles. M.S. Thesis. Texas A&M University
Witzell, W. N., and Schmid, J. R. (2005). Diet of immature Kemp’s ridley turtles (Lepidochelys kempi) from Gullivan Bay, Ten Thousand Islands, southwest Florida. Bulletin of Marine Science 77, 191–200.

## Sheet: Table S3
Prey group	Common Name	Scientific Name	Sampling Location (State, Country)	Sample Size	%C	%N	Source
Bivalve	Eastern oyster	Crassostrea virginica	Virginia and Maryland, USA	525	43.45	12.63	Fertig et al. 2014
Bivalve	Eastern oyster	Crassostrea virginica	Maryland, USA	48	–	12.18	Fertig et al. 2009
Bivalve	Mussel	Brachidontes exustus	Florida, USA	120	47.33	11.14	Fry and Smith 2002
Bivalve	California mussel	Mytilus californianus	California, USA	8	42.6	12.8	Newsome et al. 2004
Crustacean	Blue crab	Callinectes sapidus	North Carolina, USA	4	38.61	12	Wallace et al. 2009
Crustacean	Portly spider crab	Libinia emarginata	North Carolina, USA	11	41.68	12.77	Wallace et al. 2009
Crustacean	Horseshoe crab	Limulus polyphemus	North Carolina, USA	10	43.35	12.3	Wallace et al. 2009
Crustacean	Unidentified	Unidentified	California, USA	3	42.3	12	Turner Tomaszewicz et al. 2017
Crustacean	Grass shrimp	Palaemonetes vulgaris	Georgia, USA	7	30.4	8.02	Parker et al. 2008
Fish	Capelin, blue runner	Mallotus villosus, Caranx crysos	California, USA	3	48.4	13.1	Turner Tomaszewicz et al. 2017
Fish	Spot croaker	Leiostomus xanthurus	North Carolina, USA	8	56.28	9.94	Wallace et al. 2009
Fish	Southern flounder	Paralichthys lethostigma	North Carolina, USA	10	44.89	12.65	Wallace et al. 2009
Fish	Atlantic sturgeon	Acipenser oxyrinchus	Florida, USA	36	47.23	14.62	Gu et al. 2001
Fish	Killifish	Fundulus heteroclitus	Georgia, USA	7	26.6	7.52	Parker et al. 2008
Fish	Miscellaneous	Miscellaneous	California, USA	24	40.3	12.4	Newsome et al. 2004
Fish	Capelin	Mallotus villosus	France	15	35.8	10.6	Cherel et al. 2005
Fish	Herring	Clupea harengus	France	15	42.6	12.5	Cherel et al. 2005
Fish	Speckled worm eel	Myrphis punctatus	Florida, USA	56	43.51	11.41	Vaslet et al. 2011
Gastropod	Whelk spp	Busycon spp	North Carolina, USA	10	44.76	13.09	Wallace et al. 2009
Gastropod	Mud snail	Ilyanassa obsoleta	Georgia, USA	6	34.1	8.02	Parker et al. 2008
Gastropod	Unidentified	Unidentified	Guadaloupe	5	44.5	7.5	Dromard et al. 2015
Macroalgae	Sea lettuce, red algae	Ulva lactuca, Wranglia, Gracilaria	Florida, USA	–	26.7	0.6	Wilson et al. 2010
Macroalgae	Sea lettuce	Ulva spp	Alabama, USA	–	31.67	1.95	Prado et al. 2012
Macroalgae	Bladder rack	Fucus vesiculosus	North Carolina, USA	–	28.69	0.871	Raven and Osmond 1992
Macroalgae	Forkweed	Dictyota menstrualis	North Carolina, USA	–	18.08	1.53	Raven and Osmond 1992
Macroalgae	Forkweed	Padina gymnospora	North Carolina, USA	–	17.54	0.943	Raven and Osmond 1992
Macroalgae	Green sea fingers	Codium fragile	North Carolina, USA	–	23.48	1.436	Raven and Osmond 1992
Macroalgae	Red algae	Gracileria spp	Maryland, USA	174	–	1.93	Fertig et al. 2009
Macroalgae	Red algae	Bostrychia spp	Georgia, USA	4	16.7	2.09	Parker et al. 2008
Macroalgae	Sea lettuce	Ulva spp	Georgia, USA	9	24.5	2.83	Parker et al. 2008
Macroalgae	Red algae	Caloglossa spp	Georgia, USA	5	15.6	1.76	Parker et al. 2008
Macroalgae	Red algae	Grateloupia spp	Alabama, USA	–	27.44	2.57	Prado et al. 2012
Macroalgae	Unidentified	Dictyota pulchella, Acanthophora spicifera	Guadaloupe	6	12.3	1.9	Dromard et al. 2015
Seagrass	Shoal grass	Halodule wrightii	Florida, USA	–	33.1	1	Wilson et al. 2010
Seagrass	Turtle grass	Thalassia testudinum	Florida, USA	10	36.376	2.078	Barry et al. 2017
Seagrass	Turtle grass	Thalassia testudinum	Texas, USA	108	–	1.838	Delgado et al. 2017
Seagrass	Turtle grass	Thalassia testudinum	Florida, USA	10	33.4	2.3	Fourqurean and Schrlau 2003
Seagrass	Turtle grass	Thalassia testudinum	Florida, USA	5	–	2.02	Goecker et al. 2005
Seagrass	Turtle grass	Thalassia testudinum	Florida, USA	5	–	2.24	Goecker et al. 2005
Seagrass	Turtle grass	Thalassia testudinum	Alabama, USA	–	34.37	2.47	Prado et al. 2012
Seagrass	Shoal grass	Halodule and Syringodium spp	Florida, USA	11	32.2	2.1	Wilson et al. 2017
Seagrass	Turtle grass	Thalassia testudinum	Florida, USA	134	39.2	1.9	Campbell and Fourqurean 2009
Seagrass	Shoal grass	Halodule wrightii	Florida, USA	70	43.4	2.3	Campbell and Fourqurean 2009
Seagrass	Manatee grass	Syringodium filiforme	Florida, USA	77	38.9	2.1	Campbell and Fourqurean 2009
References
Barry, S., Jacoby, C., and Frazer, T. (2017). Environmental influences on growth and morphology of Thalassia testudinum. Mar. Ecol. Prog. Ser. 570, 57–70. doi:10.3354/meps12112.
Campbell, J., and Fourqurean, J. (2009). Interspecific variation in the elemental and stable isotope content of seagrasses in South Florida. Mar. Ecol. Prog. Ser. 387, 109–123. doi:10.3354/meps08093.
Cherel, Y., Hobson, K. A., and Hassani, S. (2005). Isotopic discrimination between food and blood and feathers of captive penguins: Implications for dietary studies in the wild. Physiological and Biochemical Zoology 78, 106–115. doi:10.1086/425202.
Delgado, M., Cintra-Buenrostro, C. E., and Fierro-Cabo, A. (2017). Decomposition and nitrogen dynamics of turtle grass (Thalassia testudinum) in a subtropical estuarine system. Wetlands Ecol Manage 25, 667–681. doi:10.1007/s11273-017-9543-1.
Dromard, C. R., Bouchon-Navaro, Y., Harmelin-Vivien, M., and Bouchon, C. (2015). Diversity of trophic niches among herbivorous fishes on a Caribbean reef (Guadeloupe, Lesser Antilles), evidenced by stable isotope and gut content analyses. Journal of Sea Research 95, 124–131. doi:10.1016/j.seares.2014.07.014.
Fertig, B., Carruthers, T. J. B., Dennison, W. C., Jones, A. B., Pantus, F., and Longstaff, B. (2009). Oyster and macroalgae bioindicators detect elevated δ15N in Maryland’s coastal bay. Estuaries and Coasts 32, 773–786. doi:10.1007/s12237-009-9148-x.
Fertig, B., Carruthers, T. J. B., Dennison, W. C., Meyer, K. A., and Williams, M. R. (2014). Isotopic values in oysters indicate elemental sources constrained by multiple gradients. Ecological Indicators 46, 101–109. doi:10.1016/j.ecolind.2014.06.004.
Fourqurean, J. W., and Schrlau, J. E. (2003). Changes in nutrient content and stable isotope ratios of C and N during decomposition of seagrasses and mangrove leaves along a nutrient availability gradient in Florida Bay, USA. Chemistry and Ecology 19, 373–390. doi:10.1080/02757540310001609370.
Fry, B., and Smith, T. J. (2002). Stable isotope studies of Red Mangroves and filter feeders from the Shark River estuary, Florida. Bulletin of Marine Science 70, 871–890.
Goecker, M., Heck, K., and Valentine, J. (2005). Effects of nitrogen concentrations in turtlegrass Thalassia testudinum on consumption by the bucktooth parrotfish Sparisoma radians. Mar. Ecol. Prog. Ser. 286, 239–248. doi:10.3354/meps286239.
Gu, B., Schell, D. M., Frazer, T., Hoyer, M., and Chapman, F. A. (2001). Stable carbon isotope evidence for reduced feeding of Gulf of Mexico sturgeon during their prolonged river residence period. Estuarine, Coastal and Shelf Science 53, 275–280. doi:10.1006/ecss.2001.0816.
Newsome, S. D., Phillips, D. L., Culleton, B. J., Guilderson, T. P., and Koch, P. L. (2004). Dietary reconstruction of an early to middle Holocene human population from the central California coast: insights from advanced stable isotope mixing models. Journal of Archaeological Science 31, 1101–1115. doi:10.1016/j.jas.2004.02.001.
Parker, J., Montoya, J., and Hay, M. (2008). A specialist detritivore links Spartina alterniflora to salt marsh food webs. Mar. Ecol. Prog. Ser. 364, 87–95. doi:10.3354/meps07504.
Prado, P., Carmichael, R., Watts, S., Cebrian, J., and Heck, K. (2012). Diet-dependent δ13C and δ15N fractionation among sea urchin Lytechinus variegatus tissues: implications for food web models. Mar. Ecol. Prog. Ser. 462, 175–190. doi:10.3354/meps09786.
Raven, J. A., and Osmond, C. B. (1992). Inorganic C acquisition processes and their ecological significance in inter- and sub-tidal macroalgae of North Carolina. Functional Ecology 6, 41. doi:10.2307/2389769.
Turner Tomaszewicz, C. N., Seminoff, J. A., Price, M., and Kurle, C. M. (2017). Stable isotope discrimination factors and between-tissue isotope comparisons for bone and skin from captive and wild green sea turtles (Chelonia mydas). Rapid Commun Mass Spectrom 31, 1903–1914. doi:10.1002/rcm.7974.
Vaslet, A., France, C., Phillips, D. L., Feller, I. C., and Baldwin, C. C. (2011). Stable-isotope analyses reveal the importance of seagrass beds as feeding areas for juveniles of the speckled worm eel Myrophis punctatus (Teleostei: Ophichthidae) in Florida. Journal of Fish Biology 79, 692–706. doi:10.1111/j.1095-8649.2011.03052.x.
Wallace, B. P., Avens, L., Braun-McNeill, J., and McClellan, C. M. (2009). The diet composition of immature loggerheads: Insights on trophic niche, growth rates, and fisheries interactions. Journal of Experimental Marine Biology and Ecology 373, 50–57. doi:10.1016/j.jembe.2009.03.006.
Wilson, R. M., Chanton, J., Lewis, F. G., and Nowacek, D. (2010). Concentration-dependent stable isotope analysis of consumers in the upper reaches of a freshwater-dominated estuary: Apalachicola Bay, FL, USA. Estuaries and Coasts 33, 1406–1419. doi:10.1007/s12237-010-9304-3.
Wilson, R. M., Tyson, R. B., Nelson, J. A., Balmer, B. C., Chanton, J. P., and Nowacek, D. P. (2017). Niche differentiation and prey selectivity among common bottlenose dolphins (Tursiops truncatus) sighted in St. George Sound, Gulf of Mexico. Front. Mar. Sci. 4, 235. doi:10.3389/fmars.2017.00235.
